# Supplementary material for: The Role of Fatty Acid Synthase in the Vascular Smooth Muscle Cell to Foam Cell Transition
Source: MDPI journal article supplement (doi:10.3390/cells13080658), 2024-04-09
Supplement: s1 [file s1]

**Table S1.** Antibodies used on this study.

| Protein   | Company        | Catalog number |
|-----------|----------------|----------------|
| FASN      | Cell Signaling | 3180S          |
| CD68      | Cell Signaling | 86985S         |
| SOAT1     | Cell Signaling | 35695S         |
| KLF4      | R&D Systems    | AF3640         |
| ABCA1     | Cell Signaling | 96292S         |
| Cal 1/2/3 | Santa Cruz     | SC-136987      |
| TAGLN     | Abcam          | ab14106        |
| ACTA2     | Sigma          | A5228          |

**Original blots**

# **The role of Fatty acid synthase in the vascular smooth muscle cell to foam cell transition.**

Bethany J. Bogan, Holly C. Williams, Claire M. Holden, Vraj Patel, Giji Joseph, Christopher Fierro, Hugo Sepulveda, W. Robert Taylor, Amir Rezvan, Alejandra San Martin.

**FASN**

273 kDa

Figure 3: (HASMCs +/- Cholesterol)

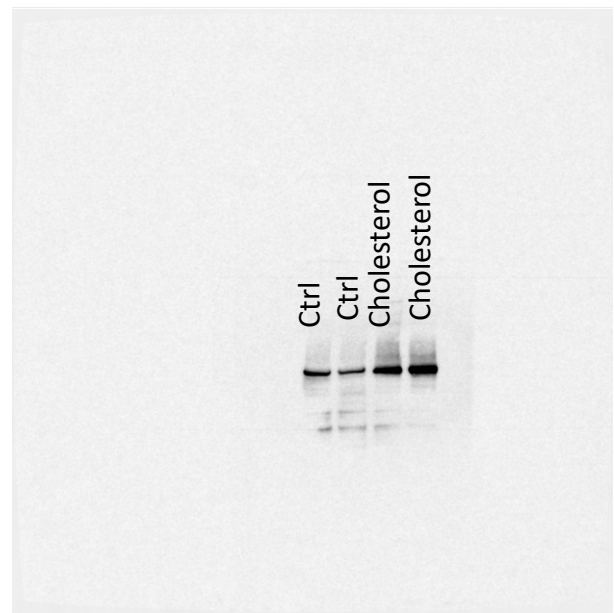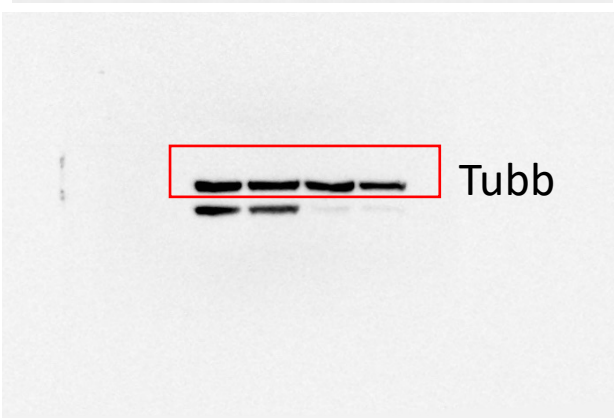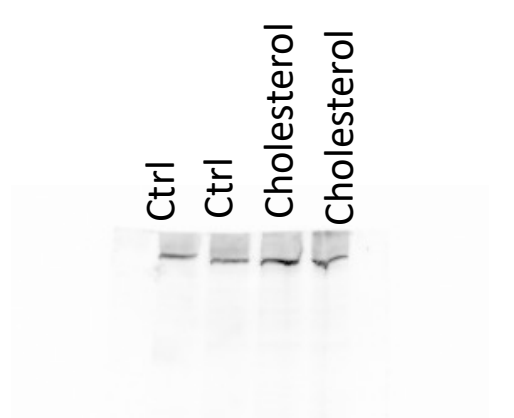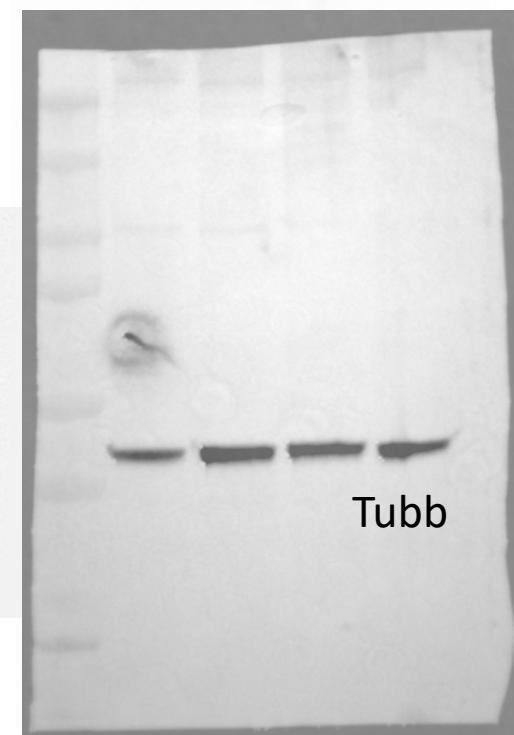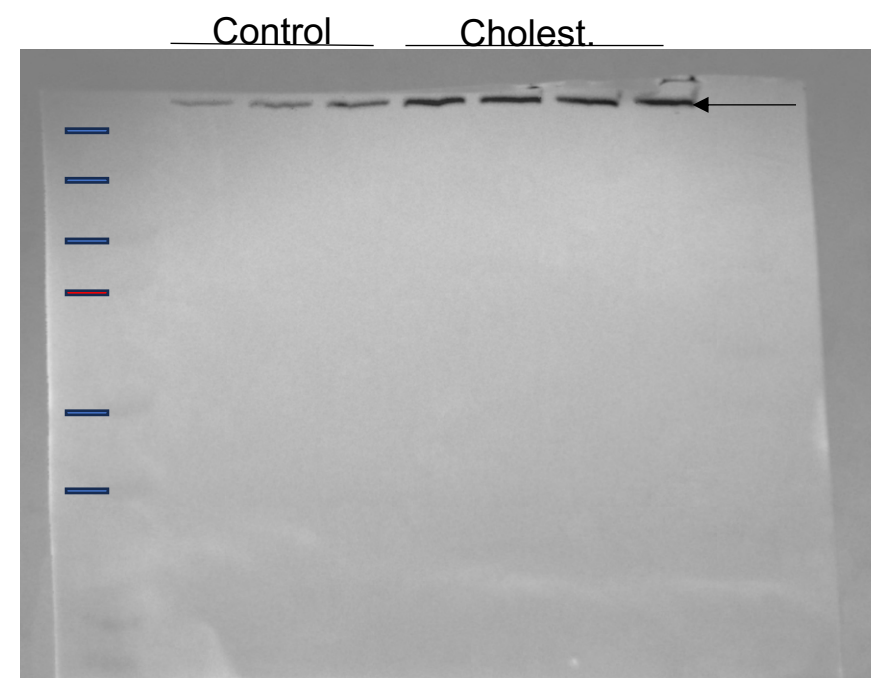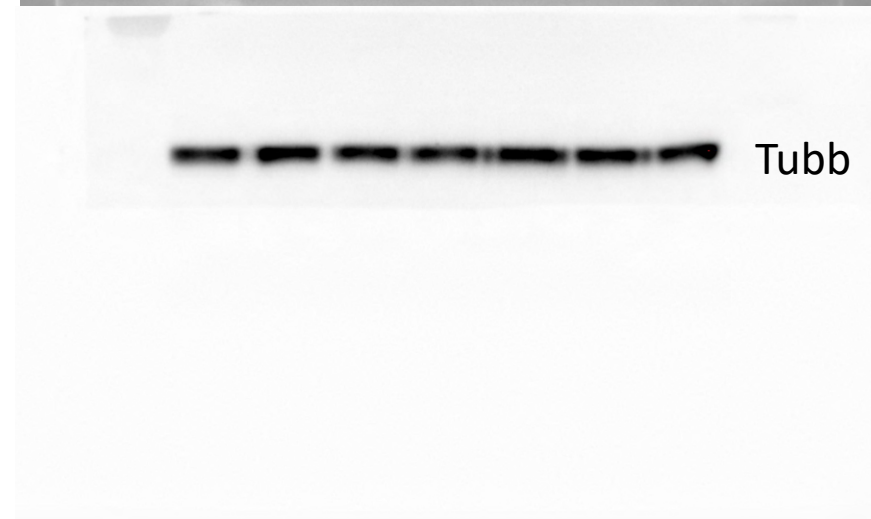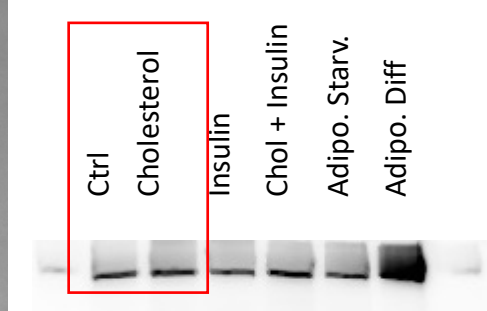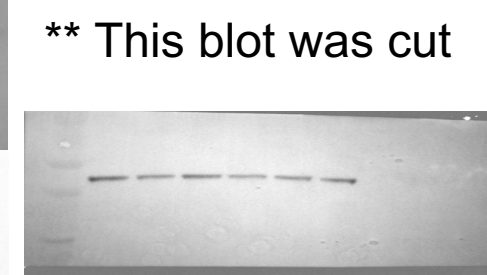

\*\* This blot was cut

# SMA

## Figure 3: (HASMCs +/- Cholesterol)

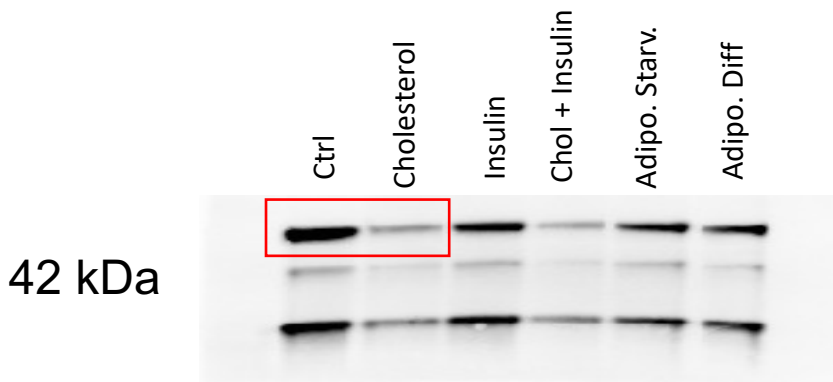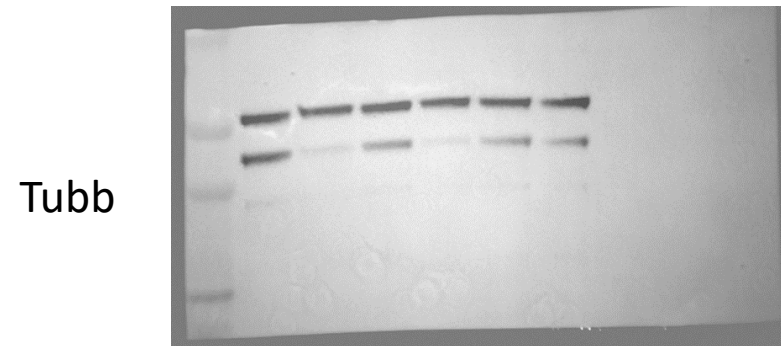

\*\* This blot was cut

\*\* This blot was cut

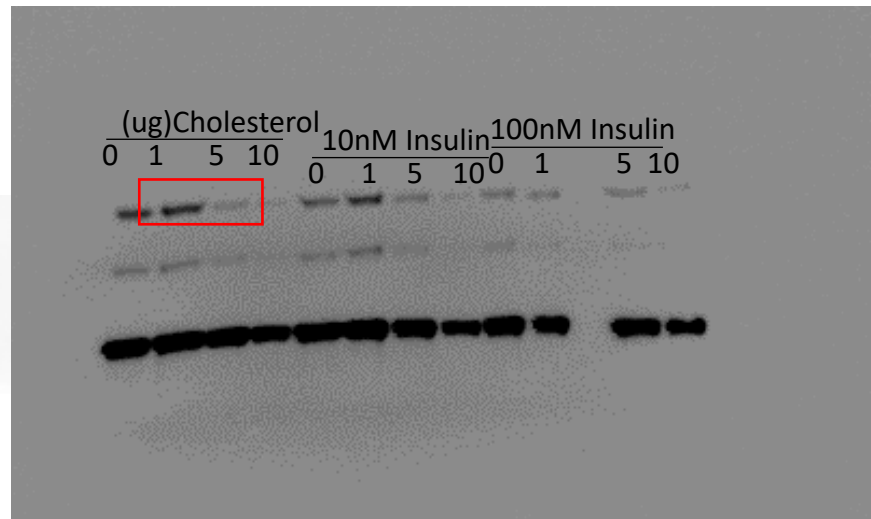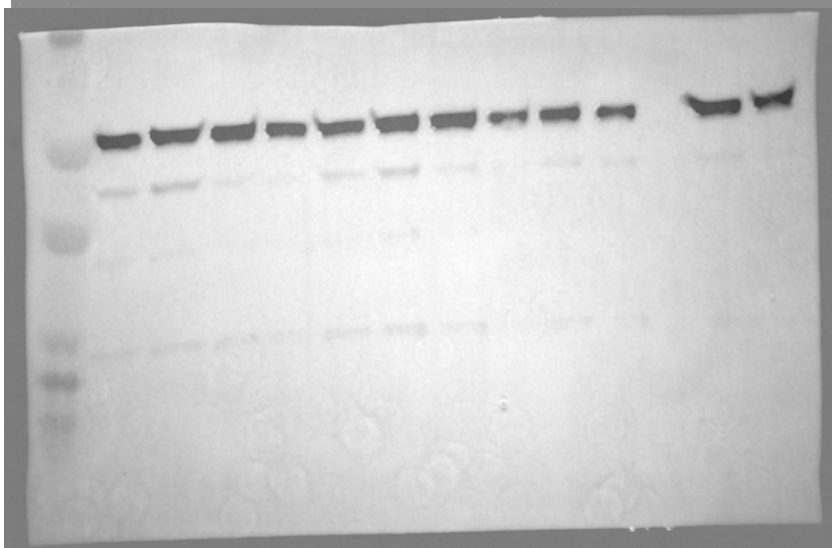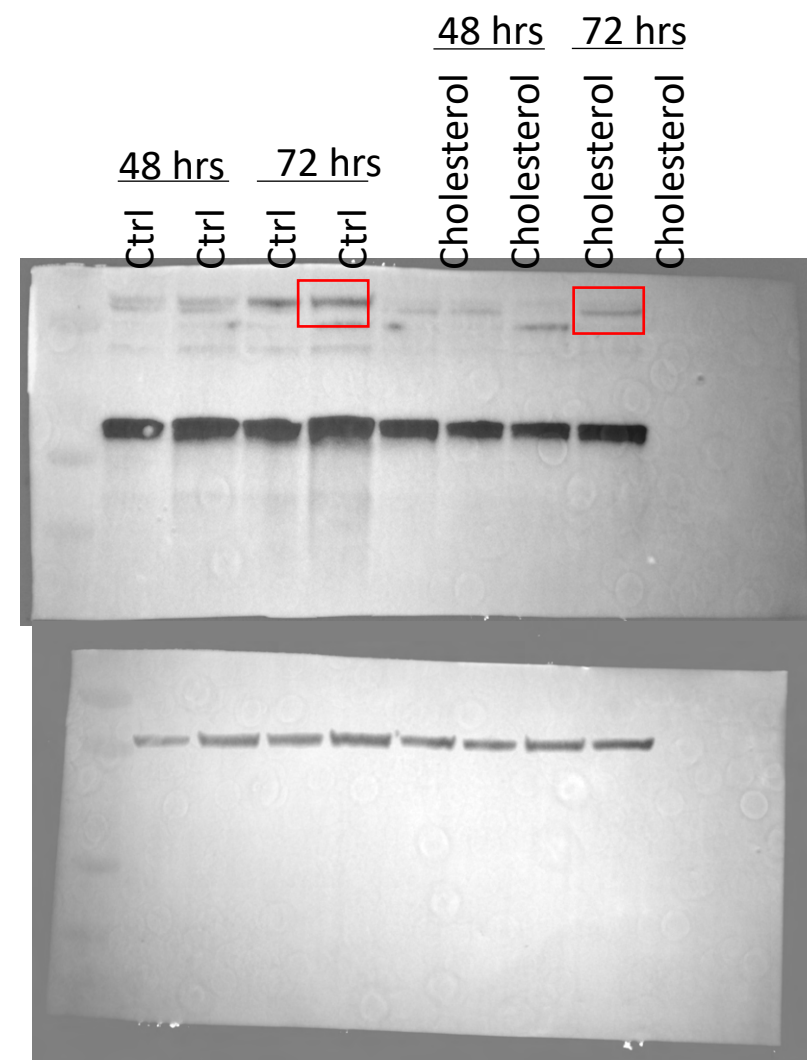

\*\* This blot was cut



**SM22**

# Figure 3: (HASMCs +/- Cholesterol)

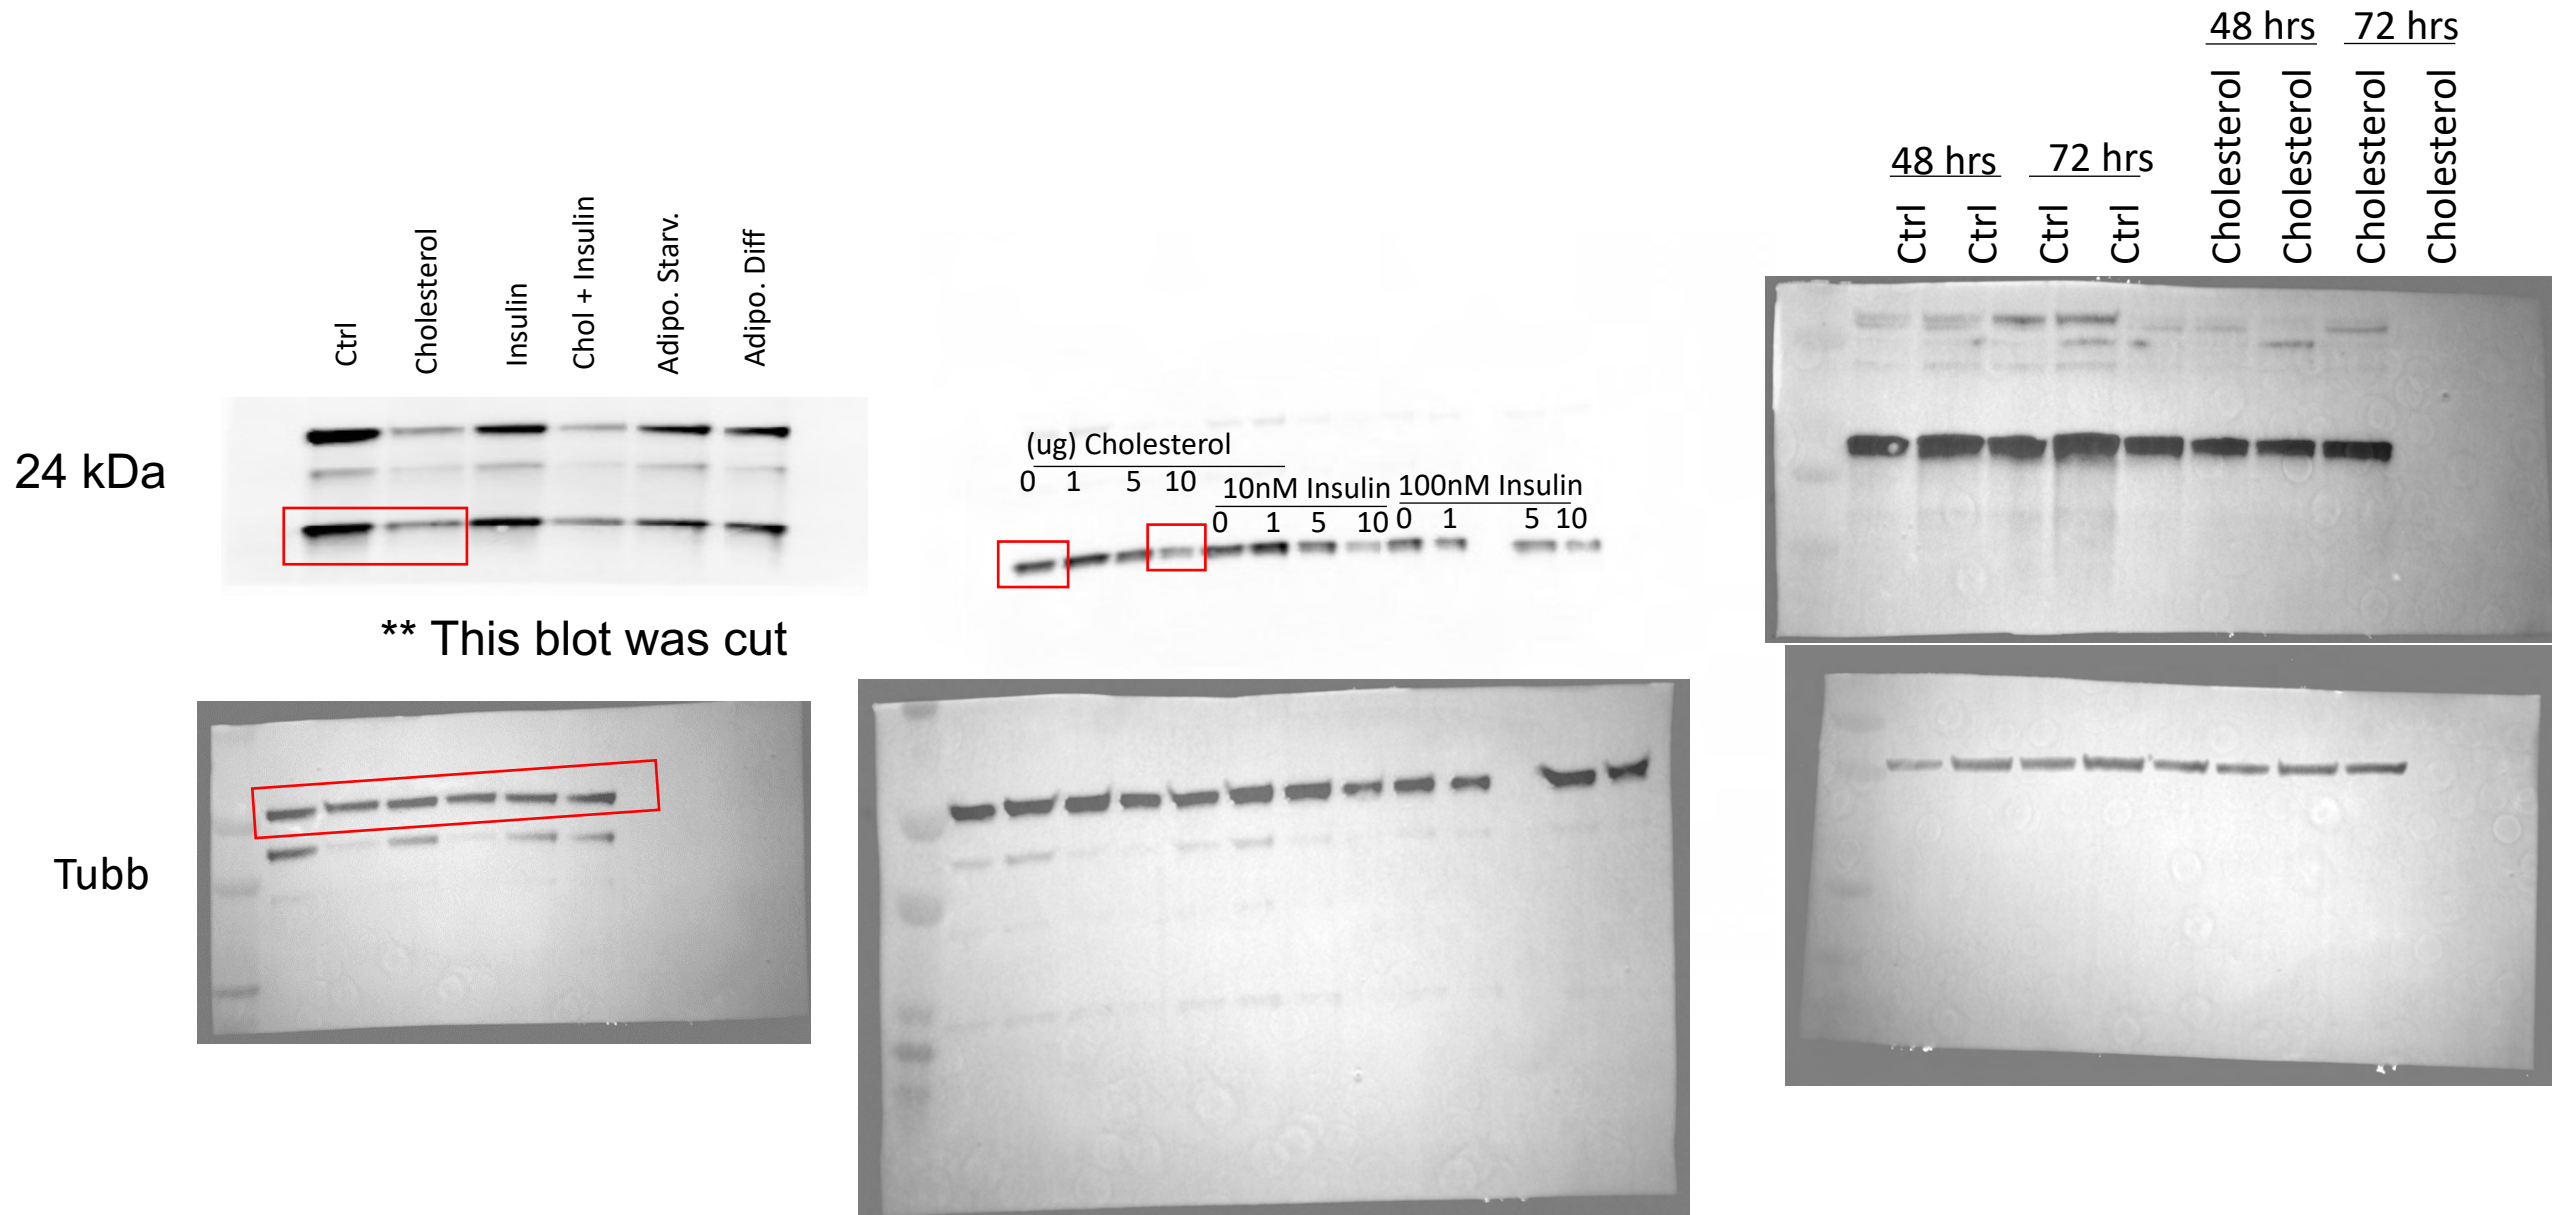

**KLF4** 53 kDa

Figure 3: (HASMCs +/- Cholesterol)

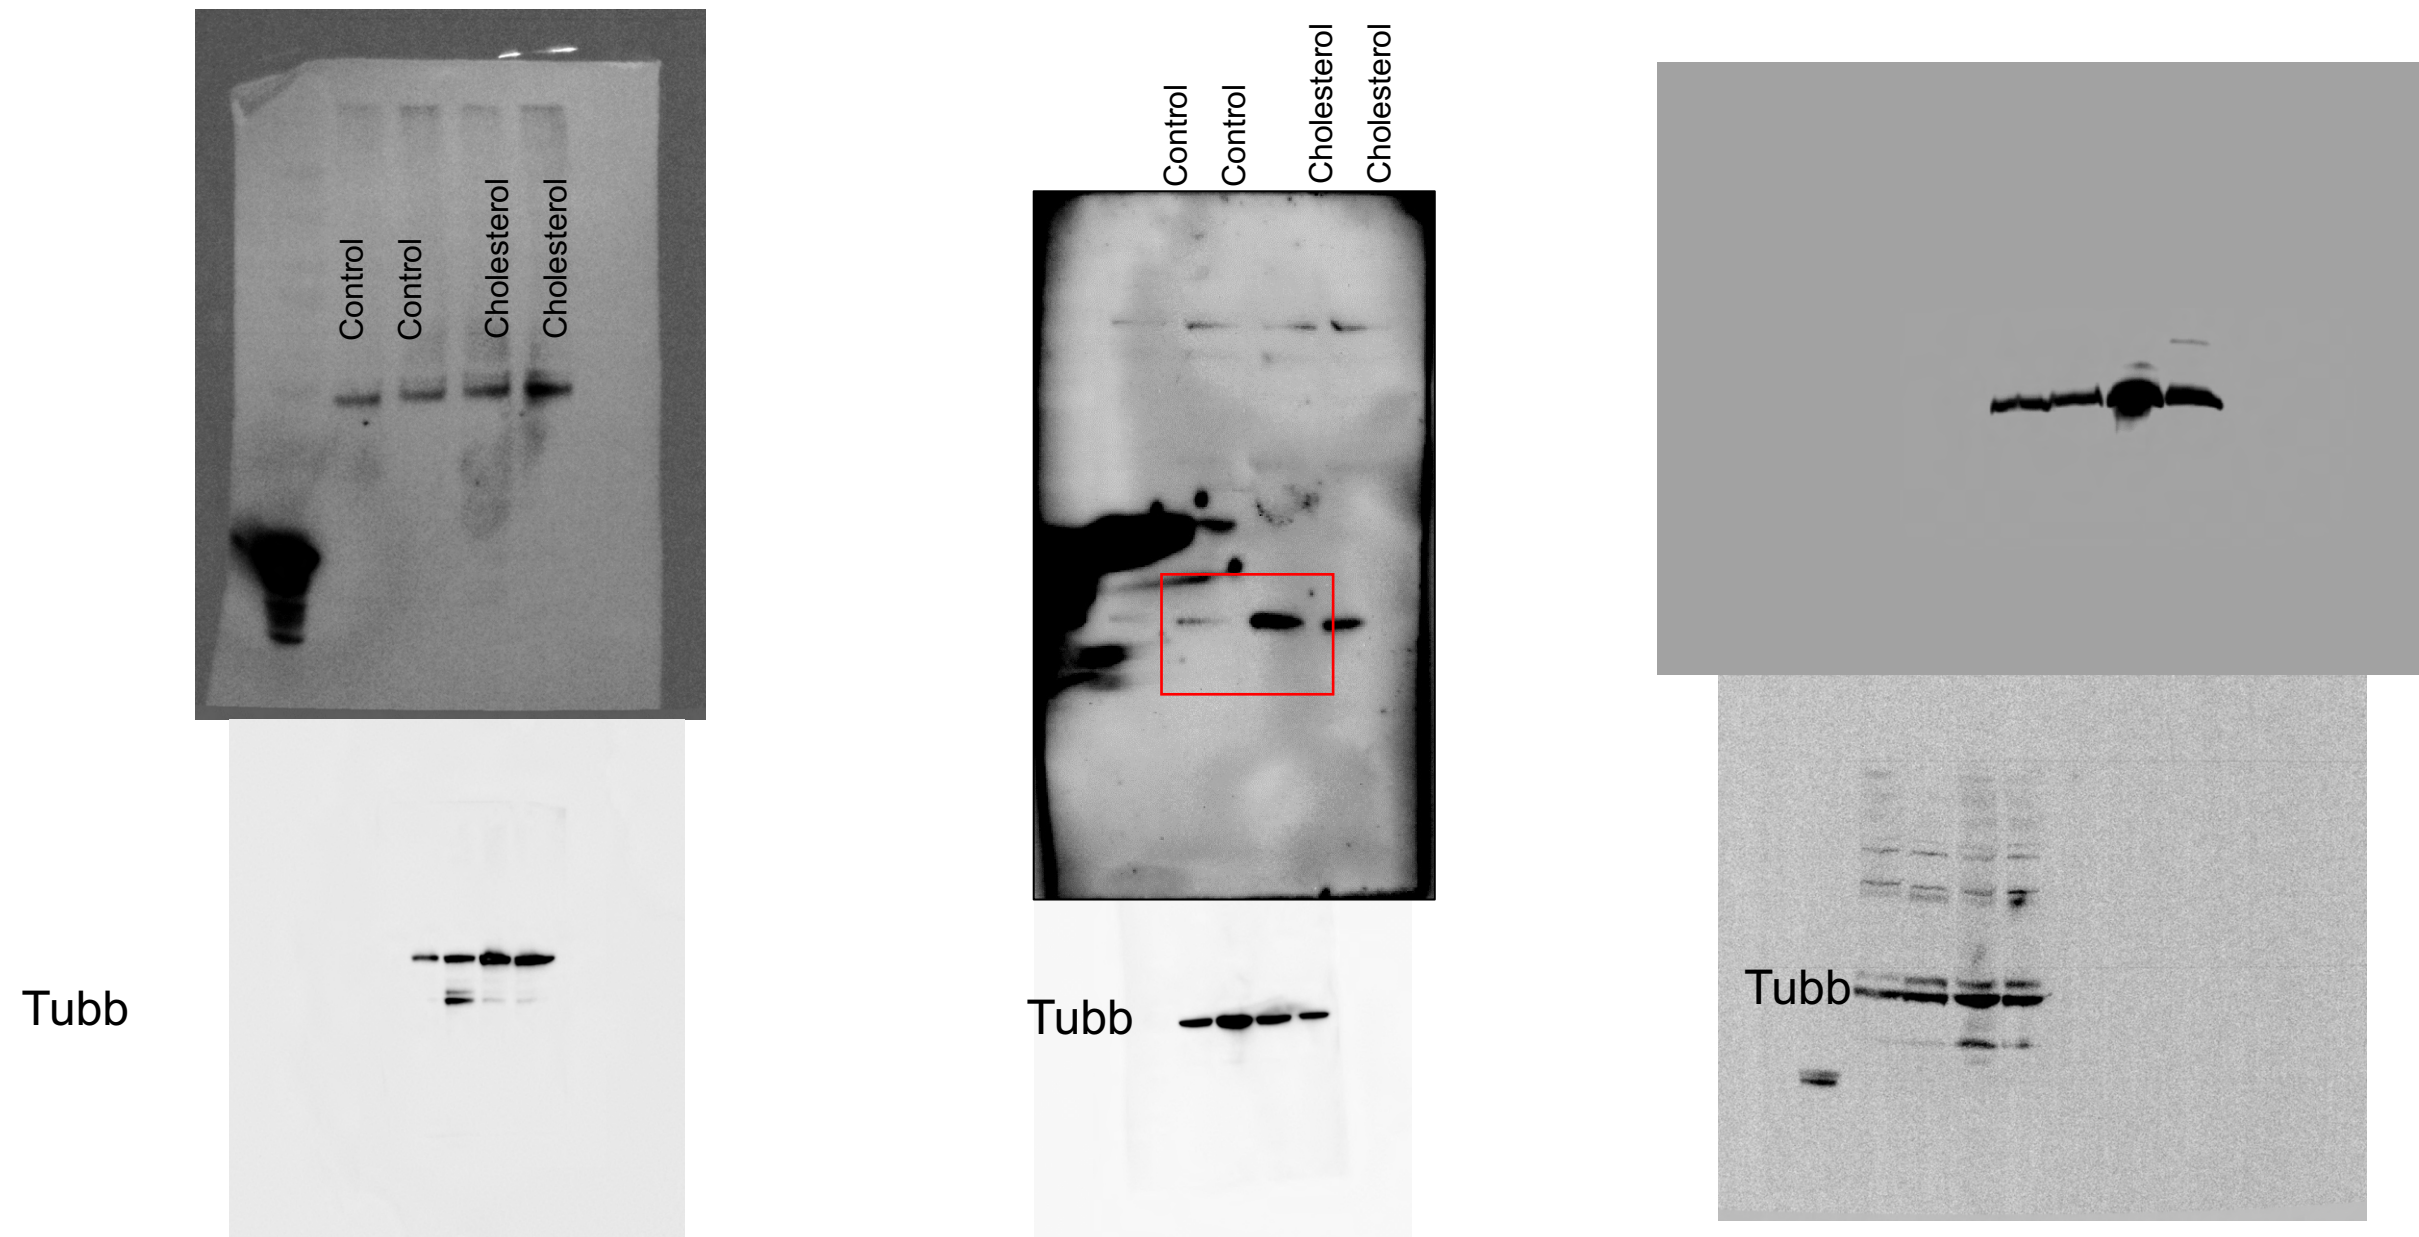

**CNN123**

# Figure 3: (HASMCs +/- Cholesterol)

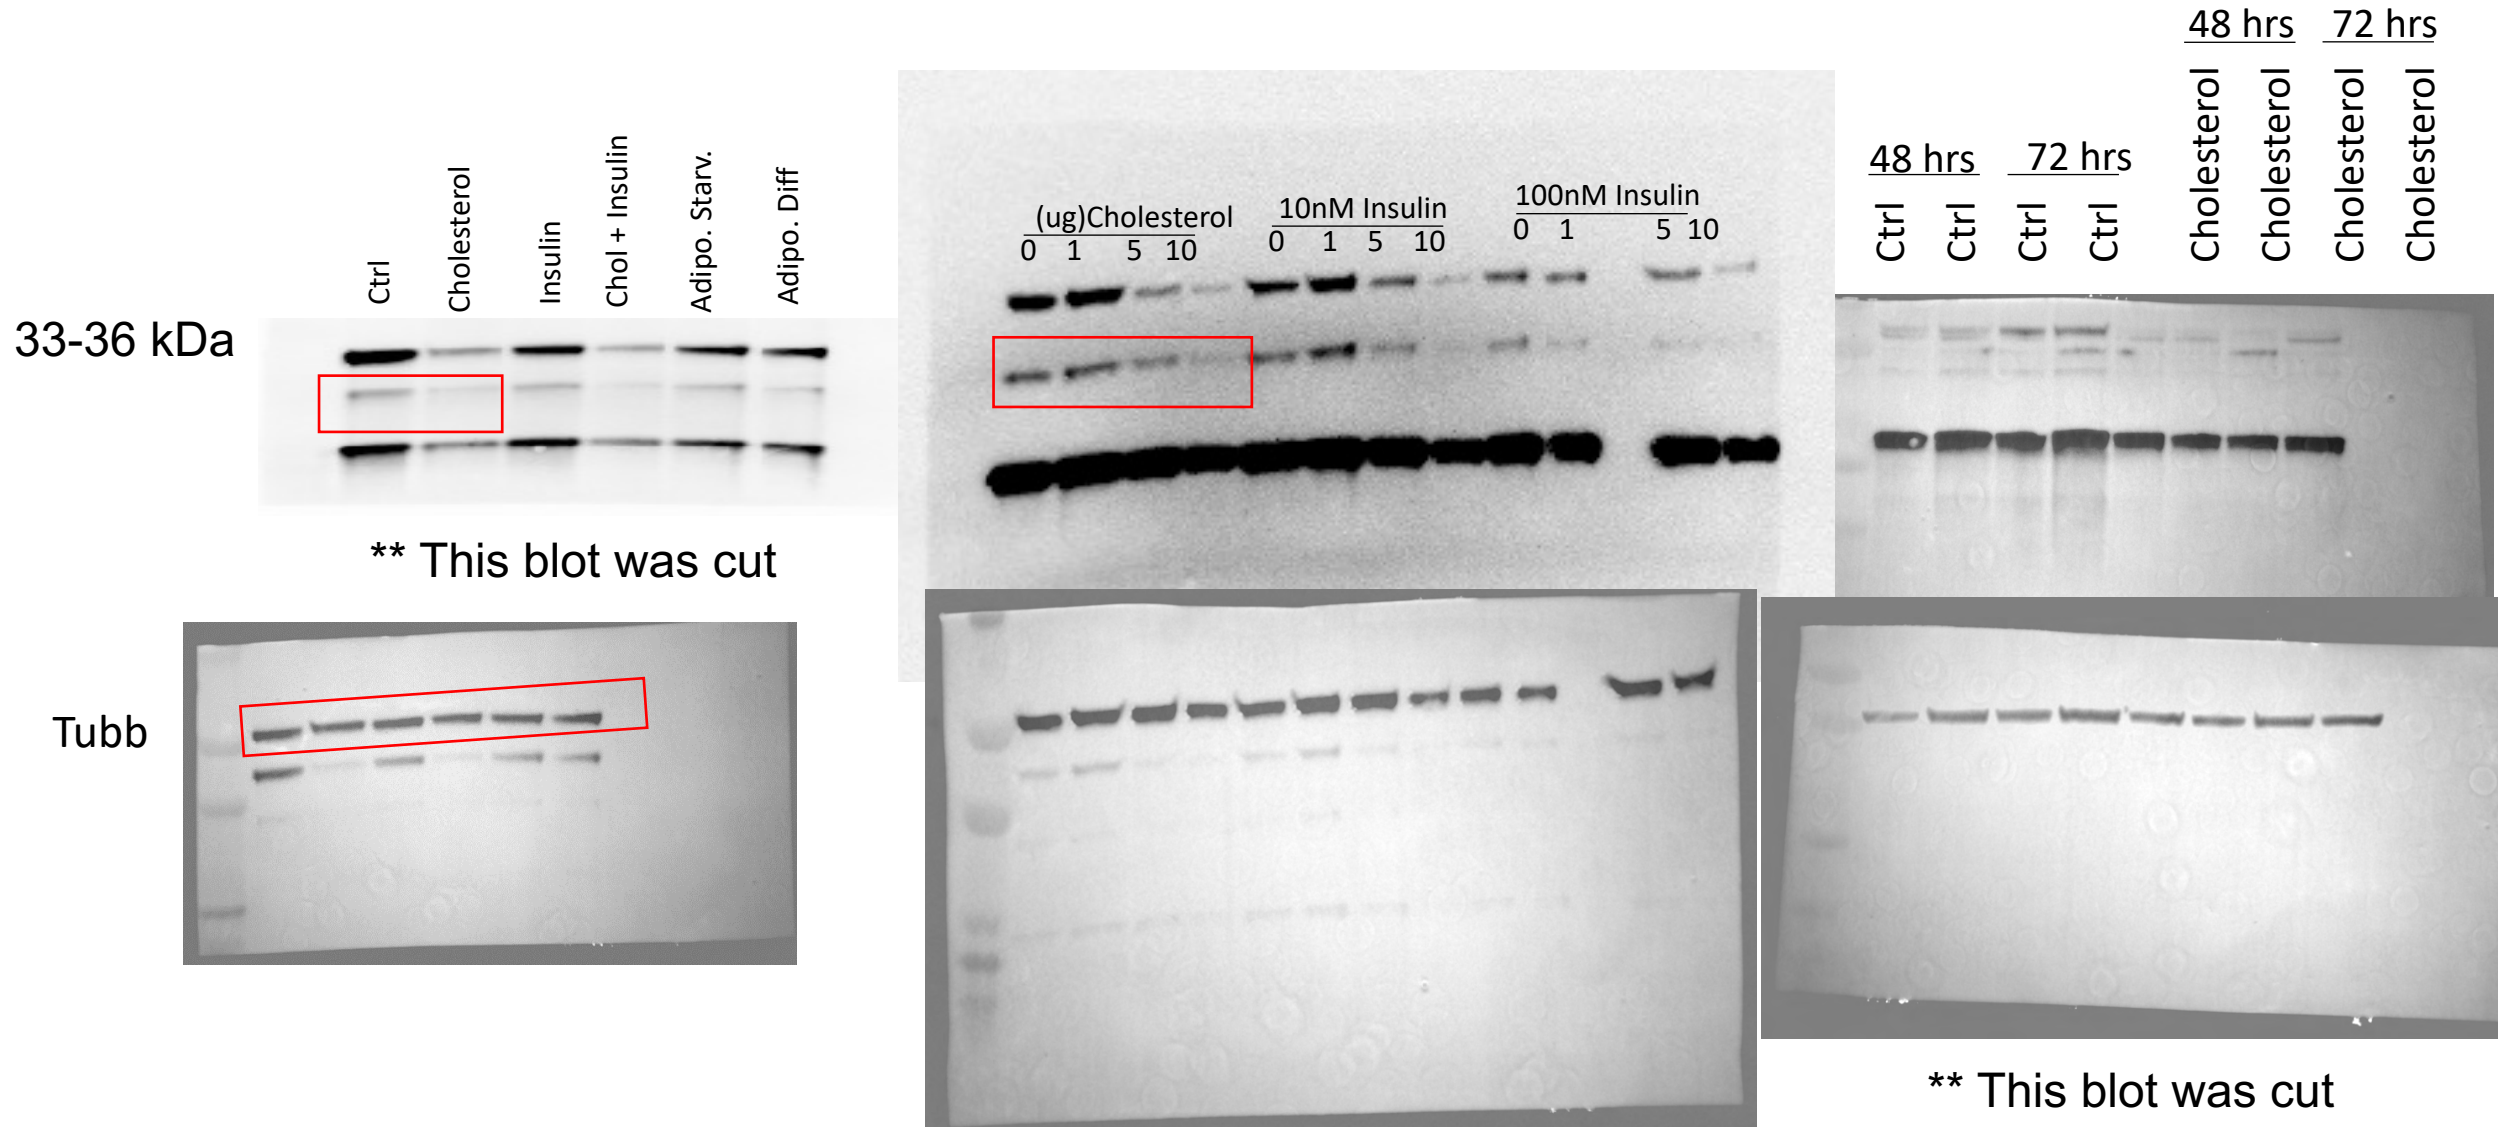



# CD68

## Figure 3: (HASMCs +/- Cholesterol)

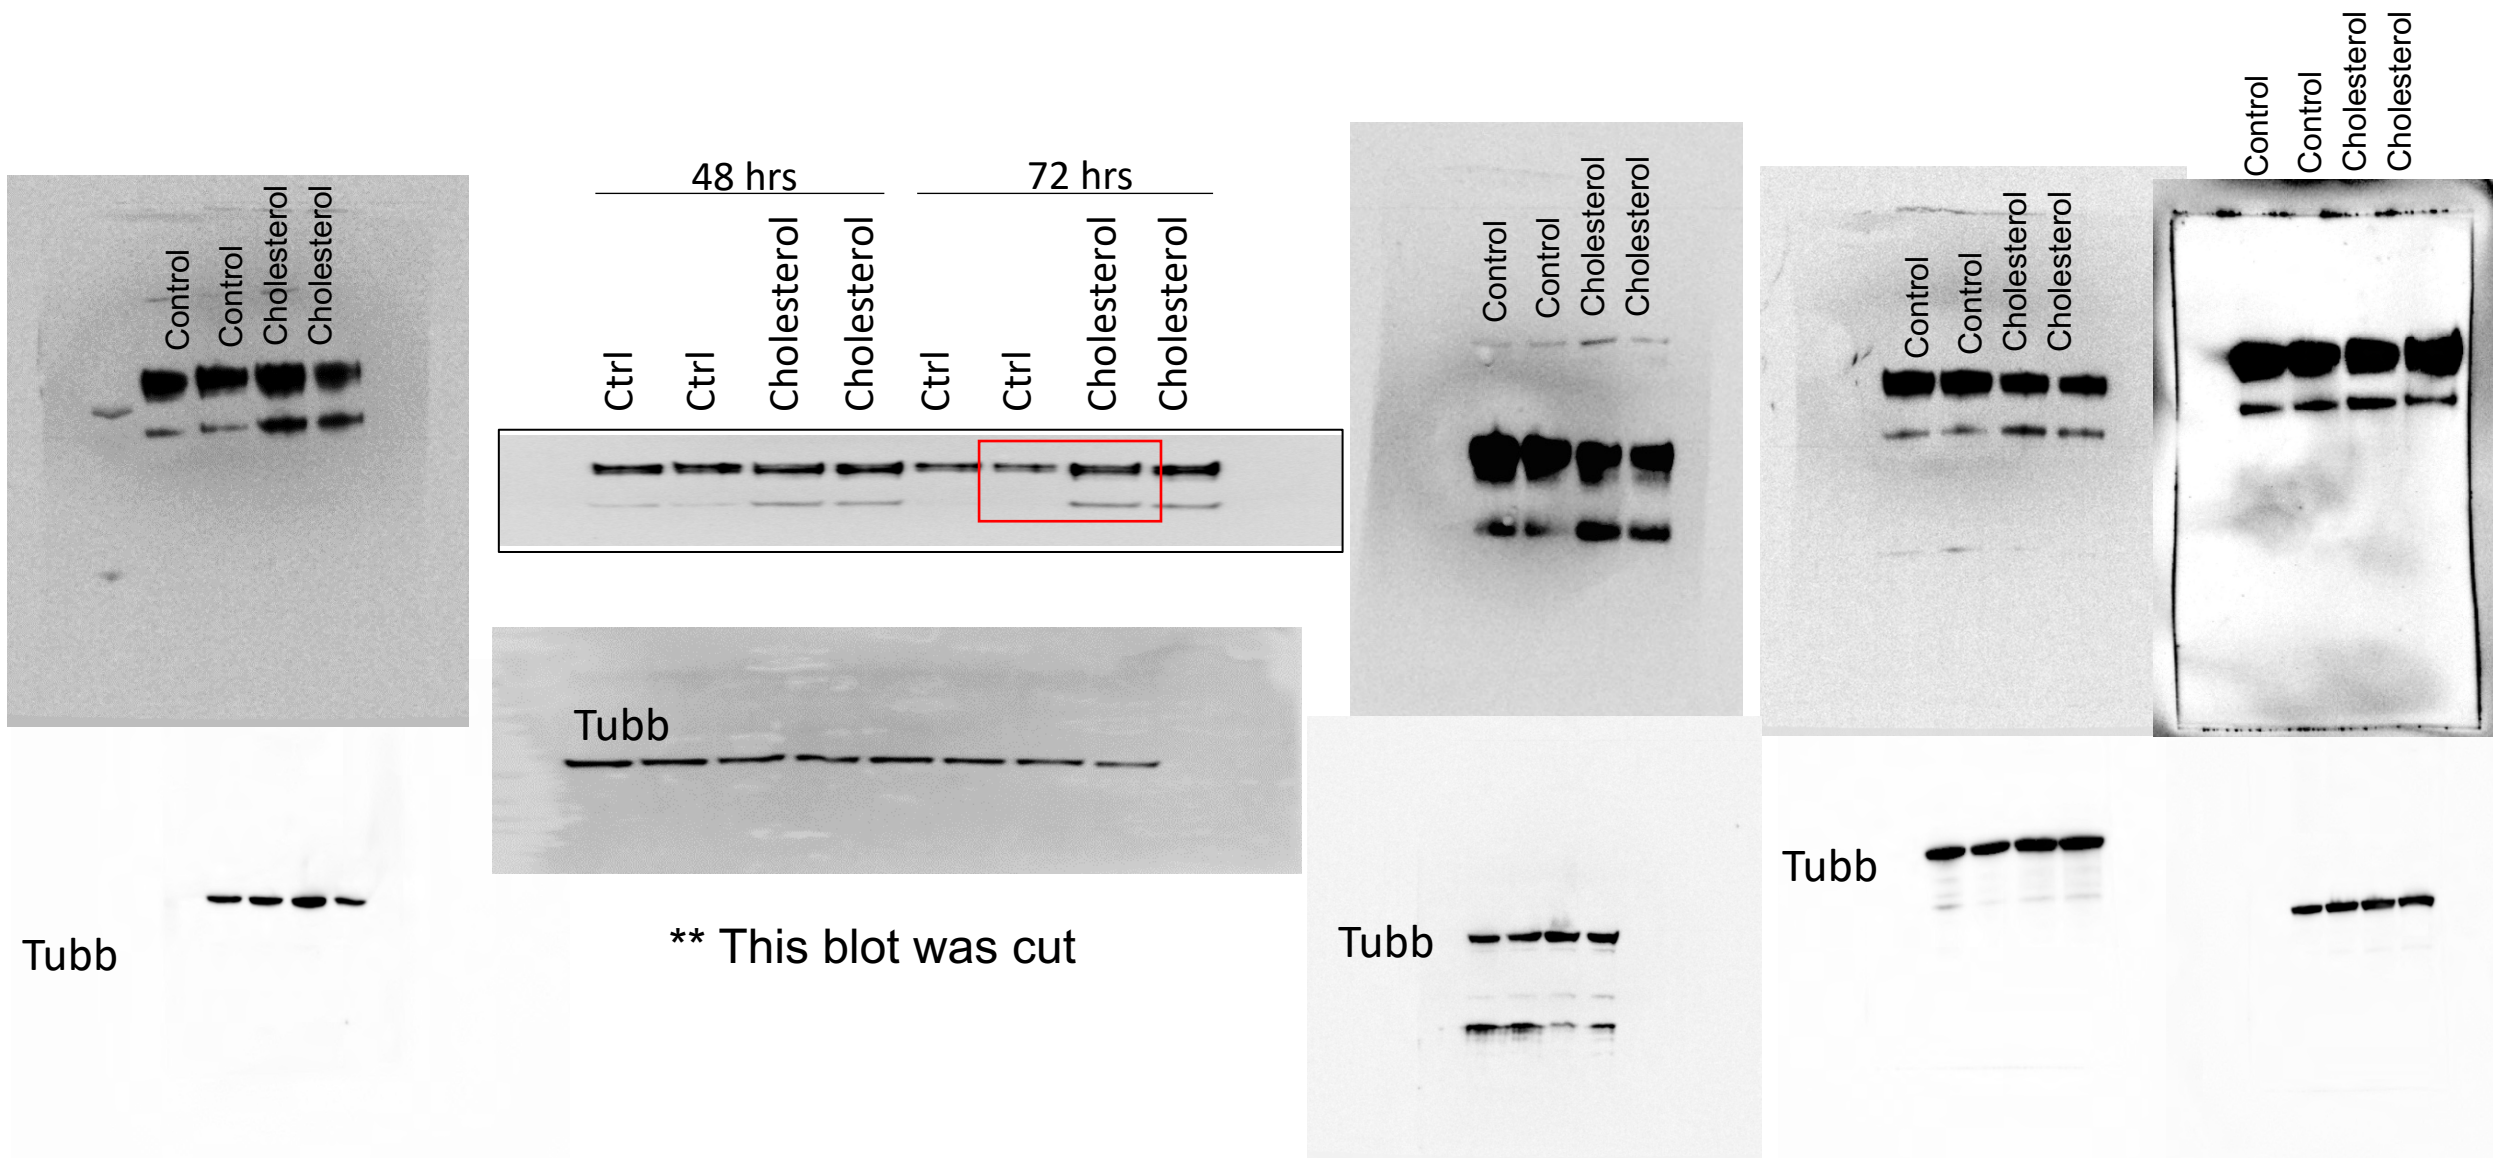

**CD68** 110 and 78 kDa

| Control |       |        |        | Cholesterol |       |        |        |
|---------|-------|--------|--------|-------------|-------|--------|--------|
| siNeg   | siNeg | siFASN | siFASN | siNeg       | siNeg | siFASN | siFASN |

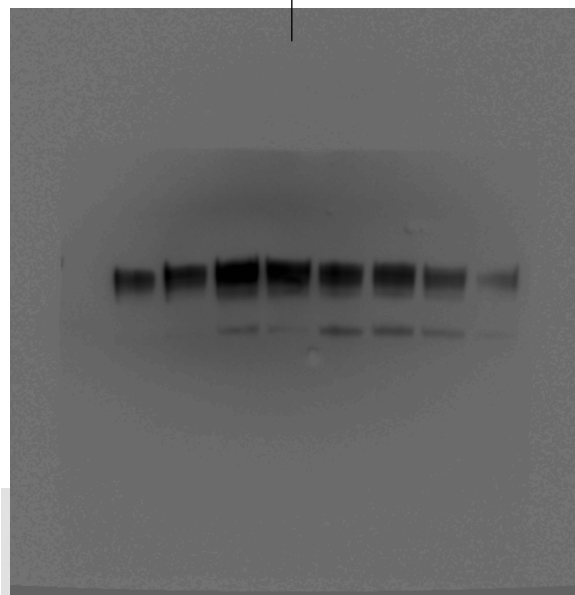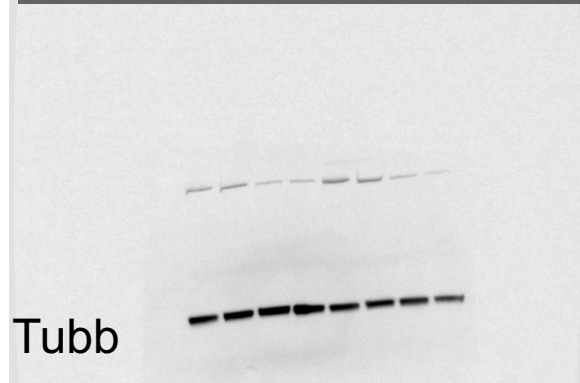

Figure 4: (siFASN +/- Cholesterol)

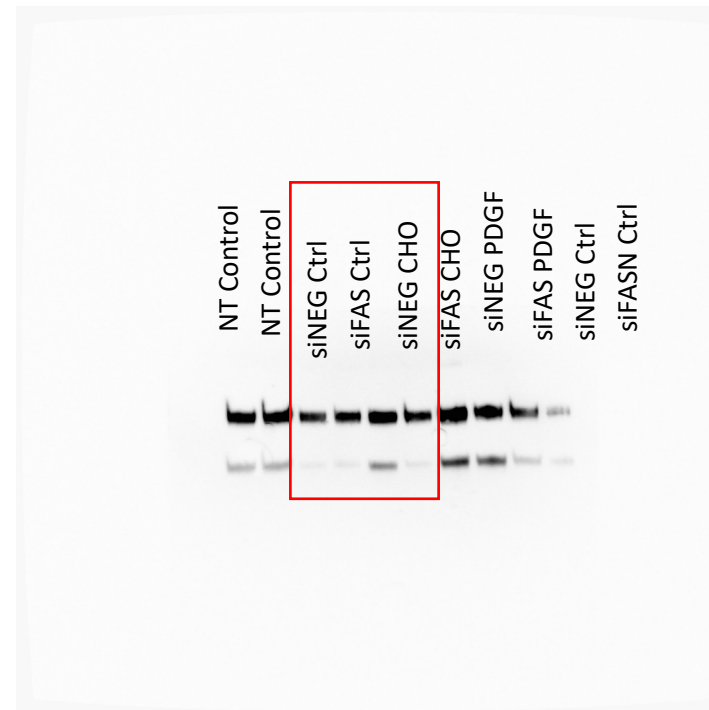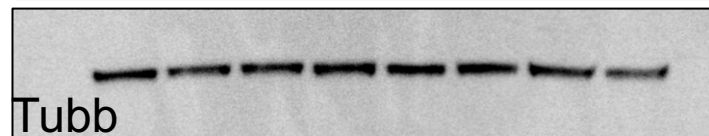

\*\* This membrane was cut during tubulin exposure

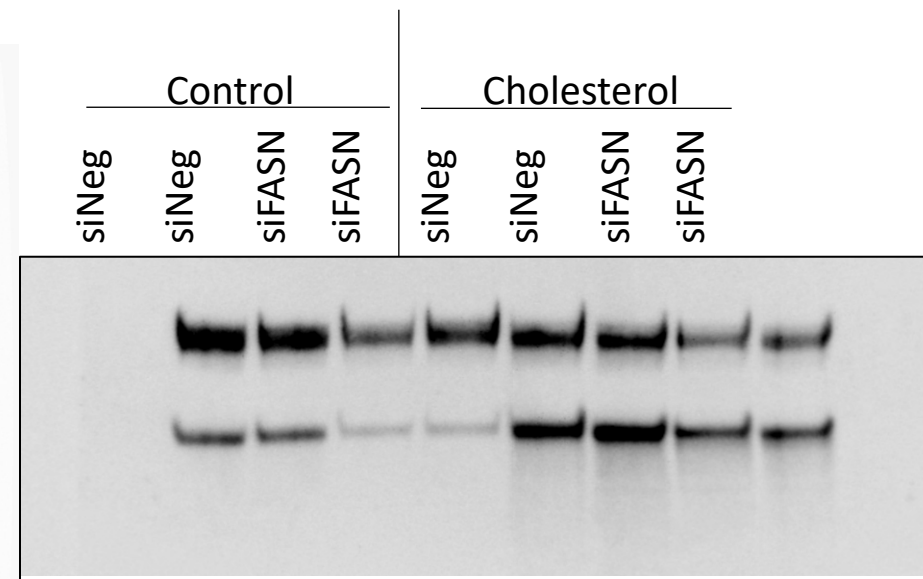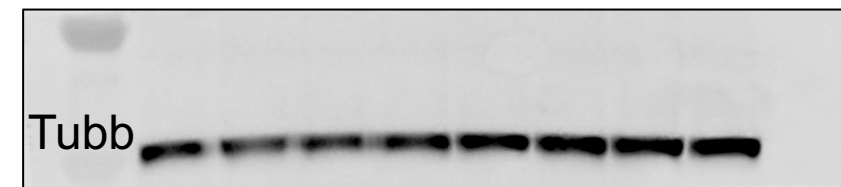

\*\* This membrane was cut

**KLF4**

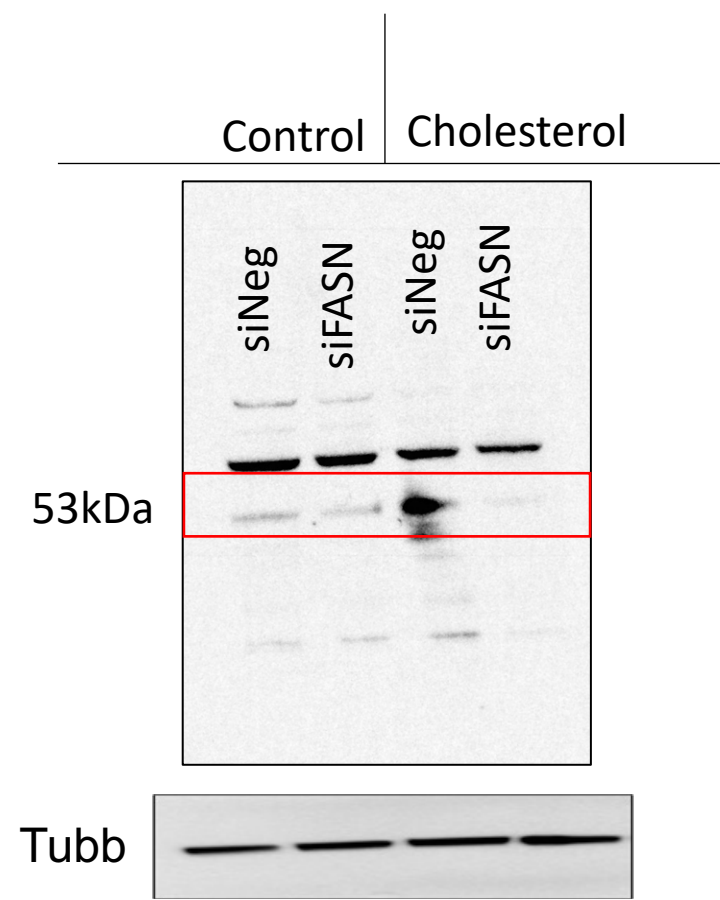

\*\* This membrane was cut during tubulin exposure

Figure 4: (siFASN+/- Cholesterol)

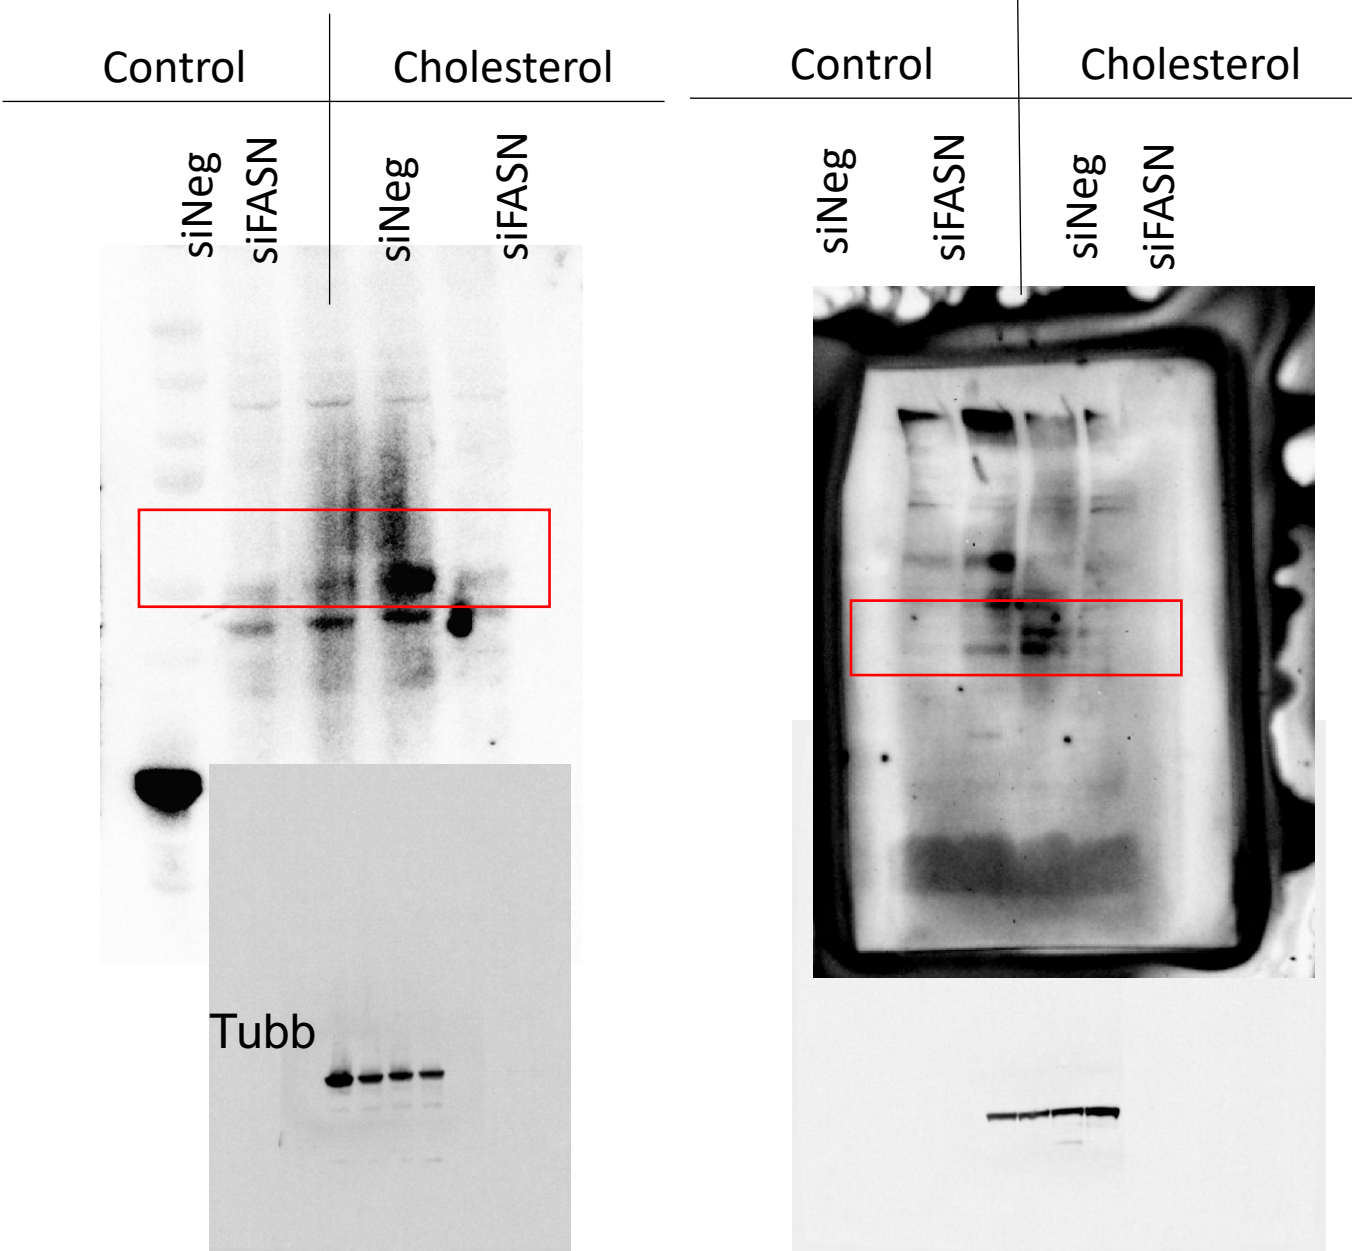



# ABCA1

Figure 7: (HASMCs +/- Cholesterol)

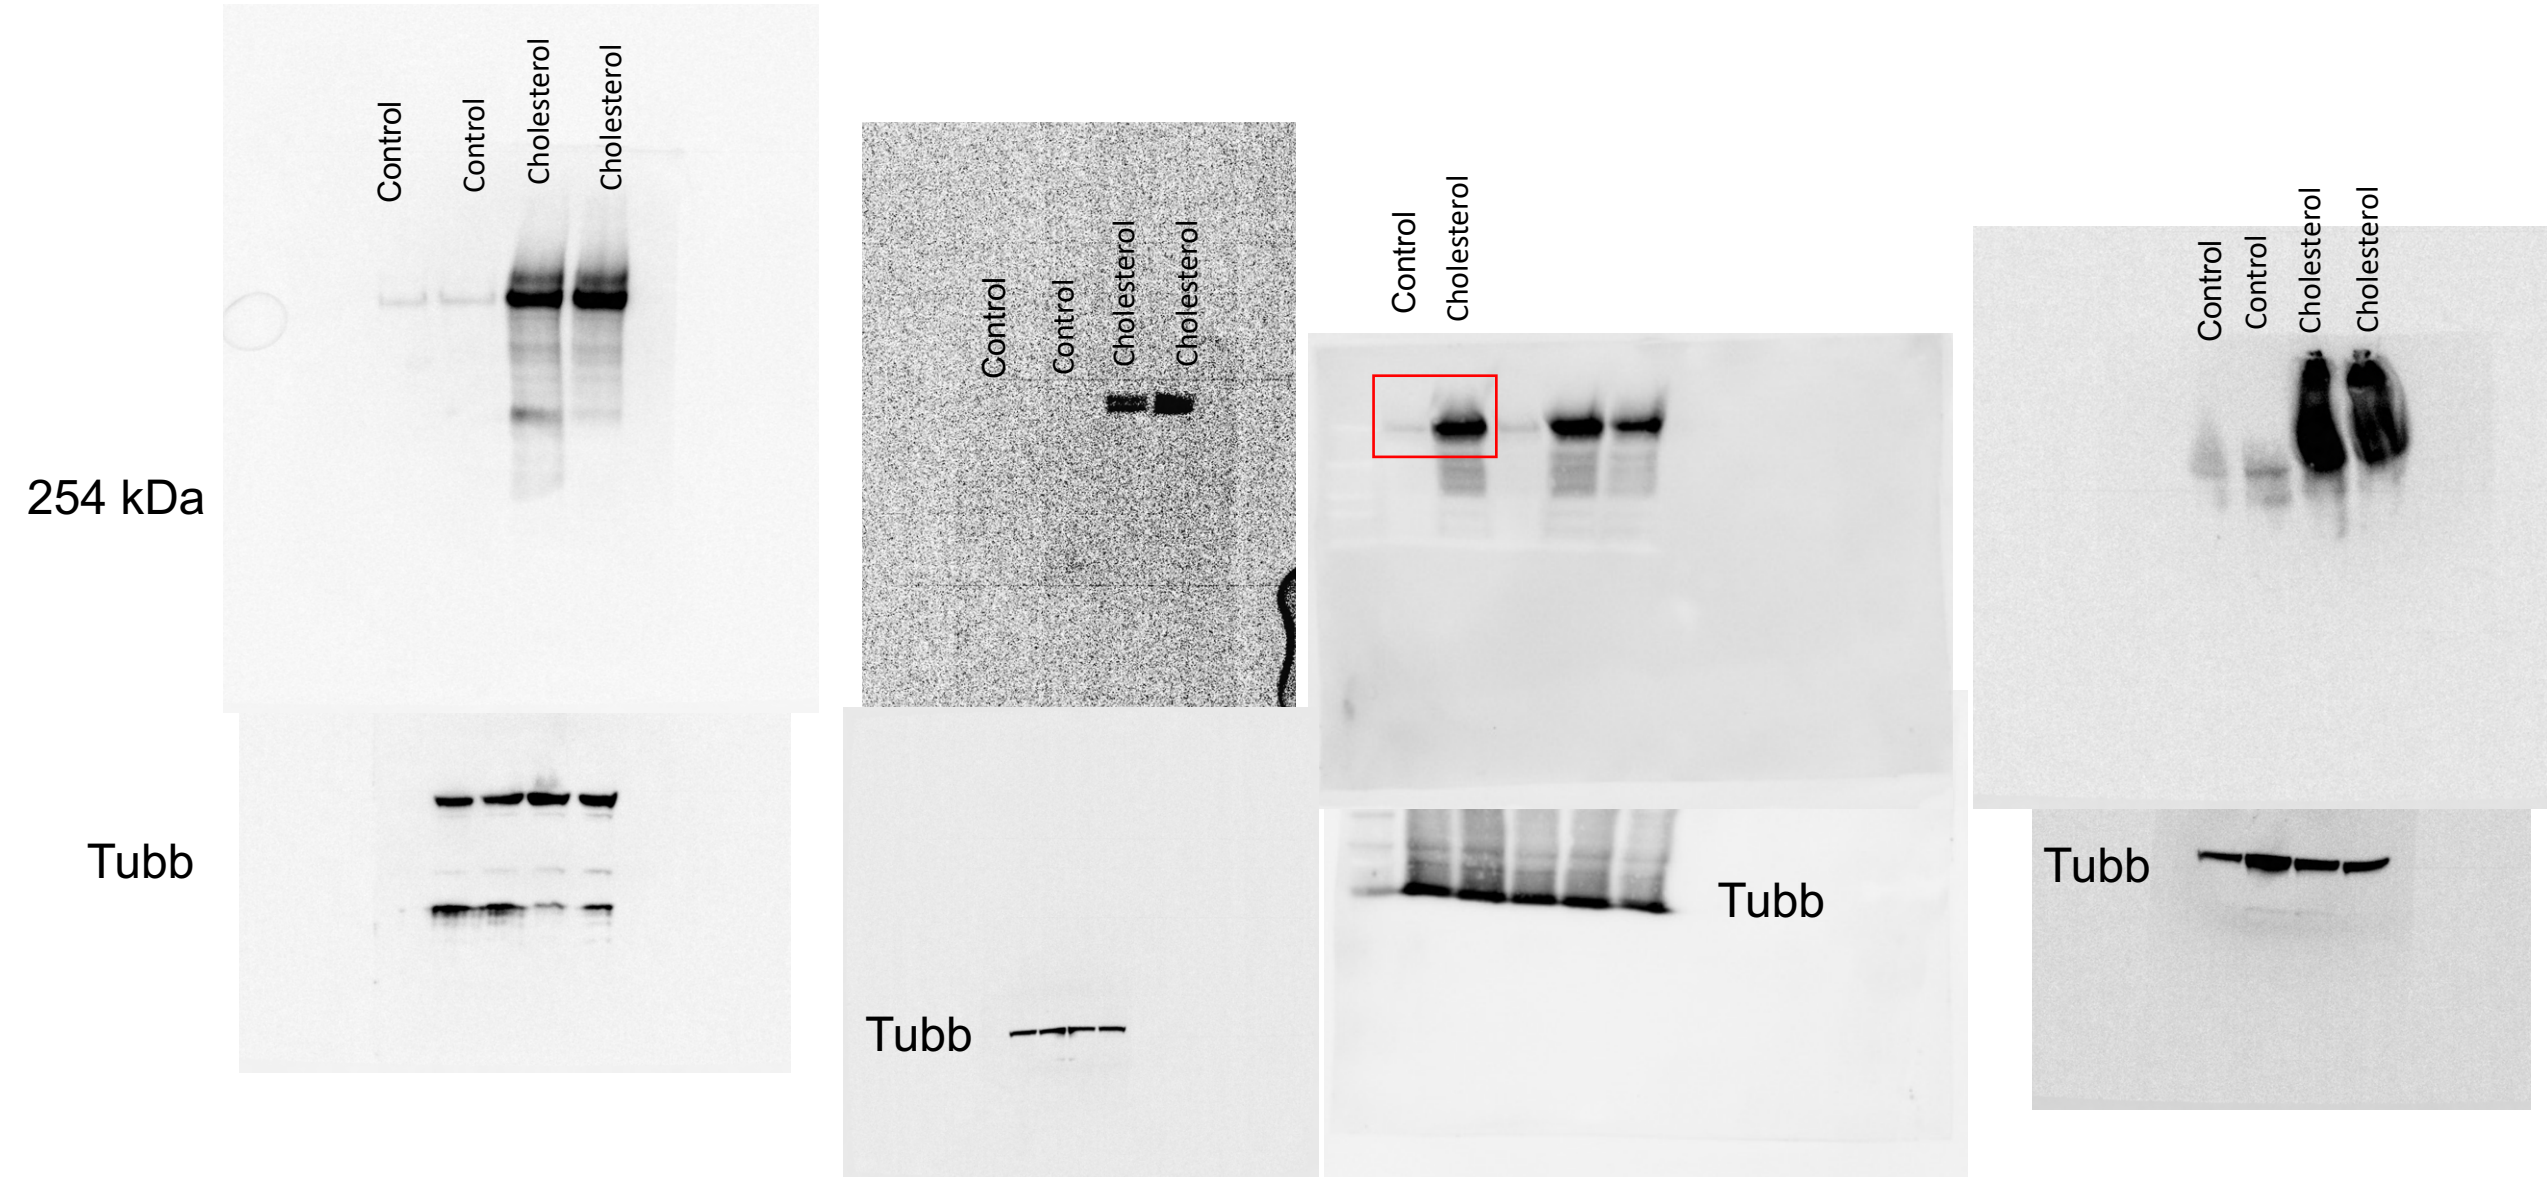

# Figure 7: (HASMCs +/- Cholesterol)

## SOAT1

45 kDa

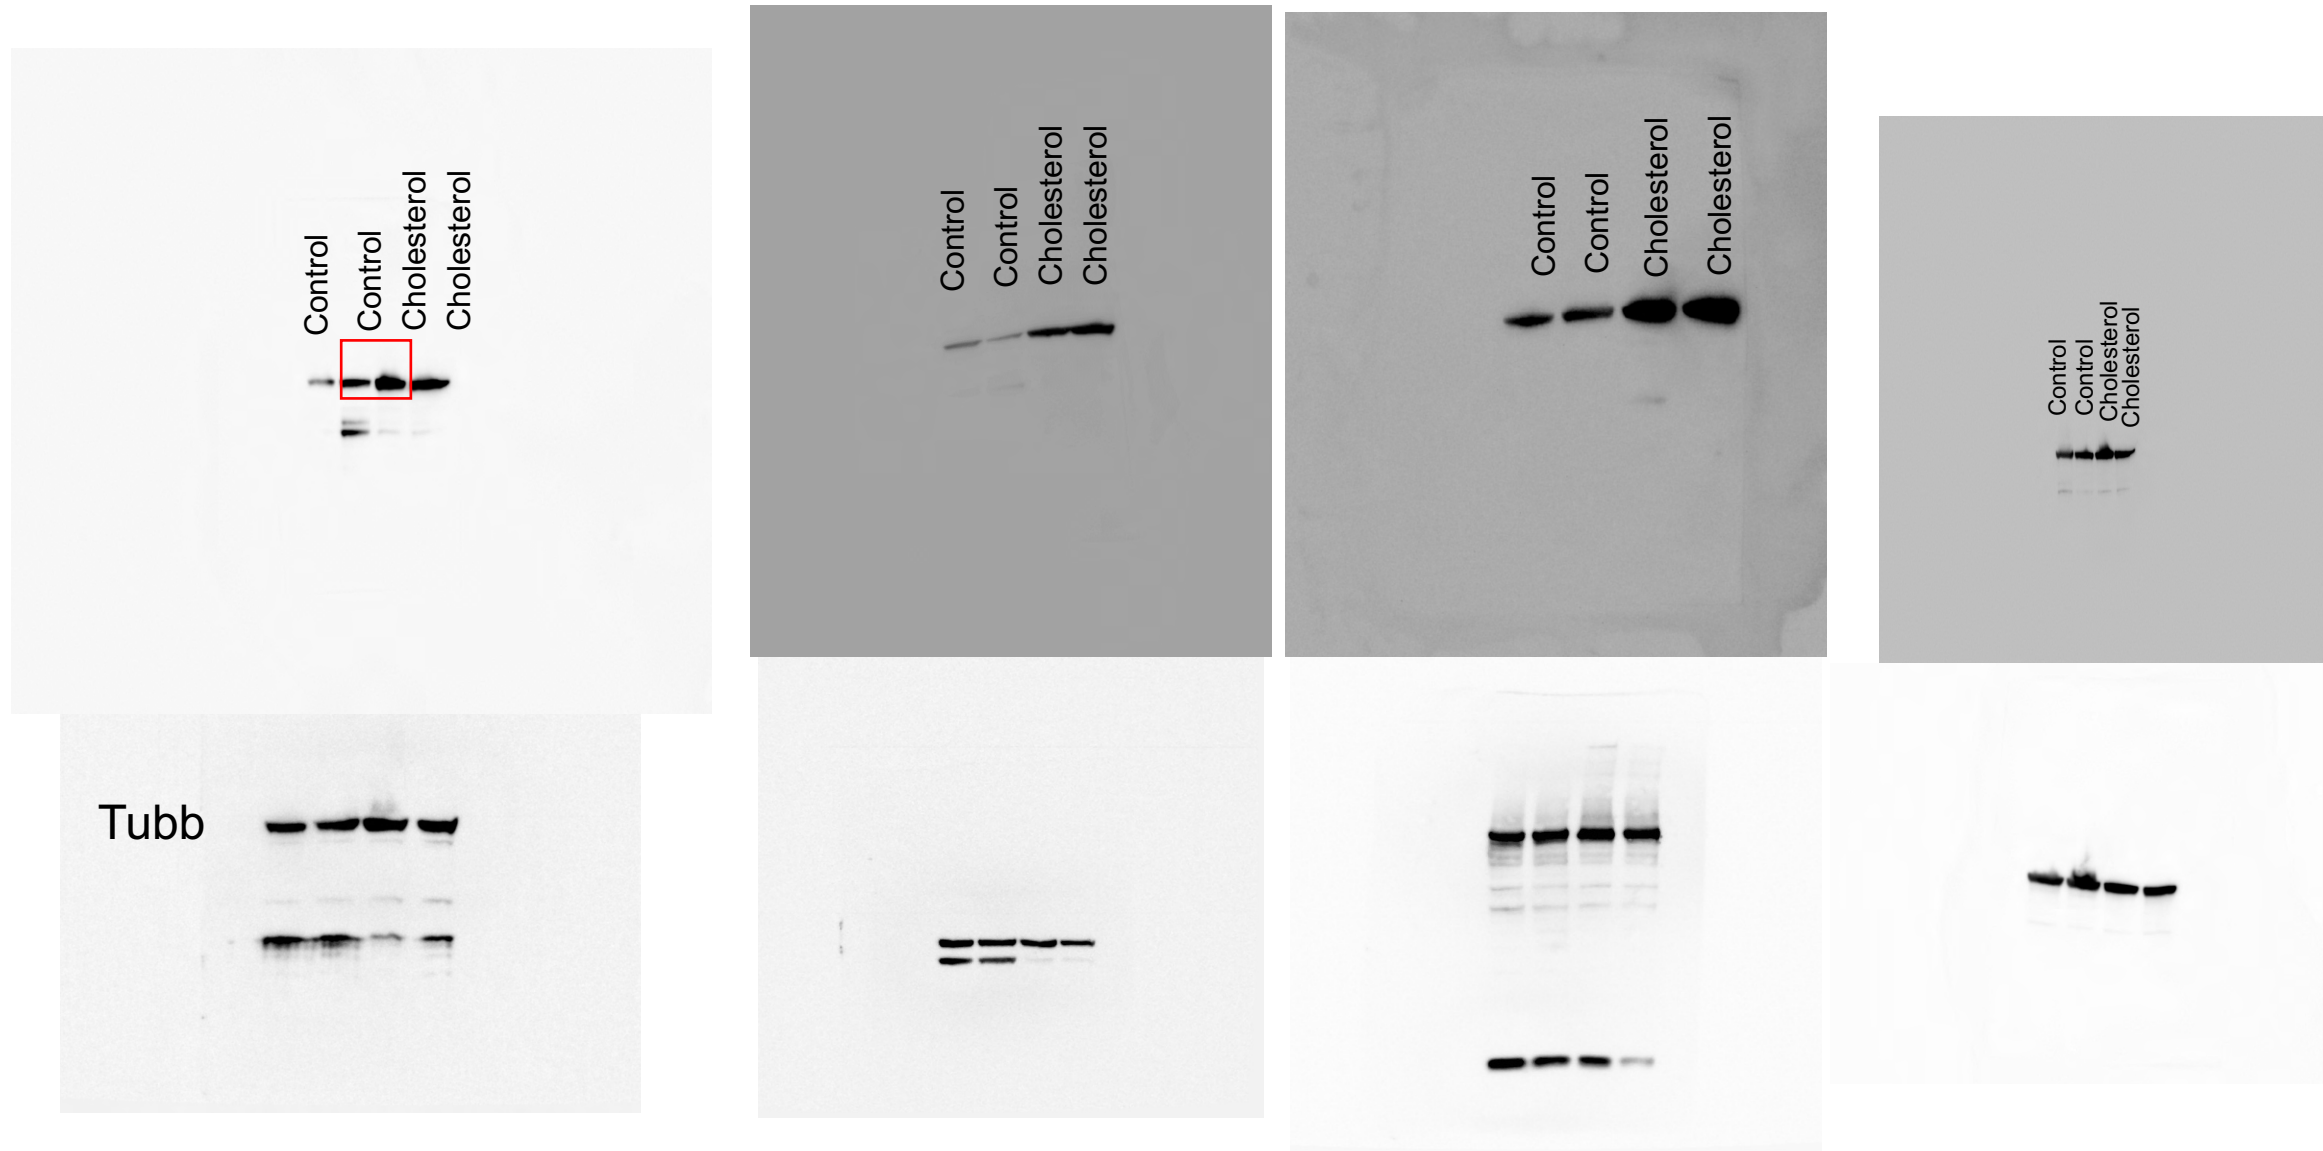

# ABCA1, 3-8% gel

## Figure 7: (siFASN +/- Cholesterol)

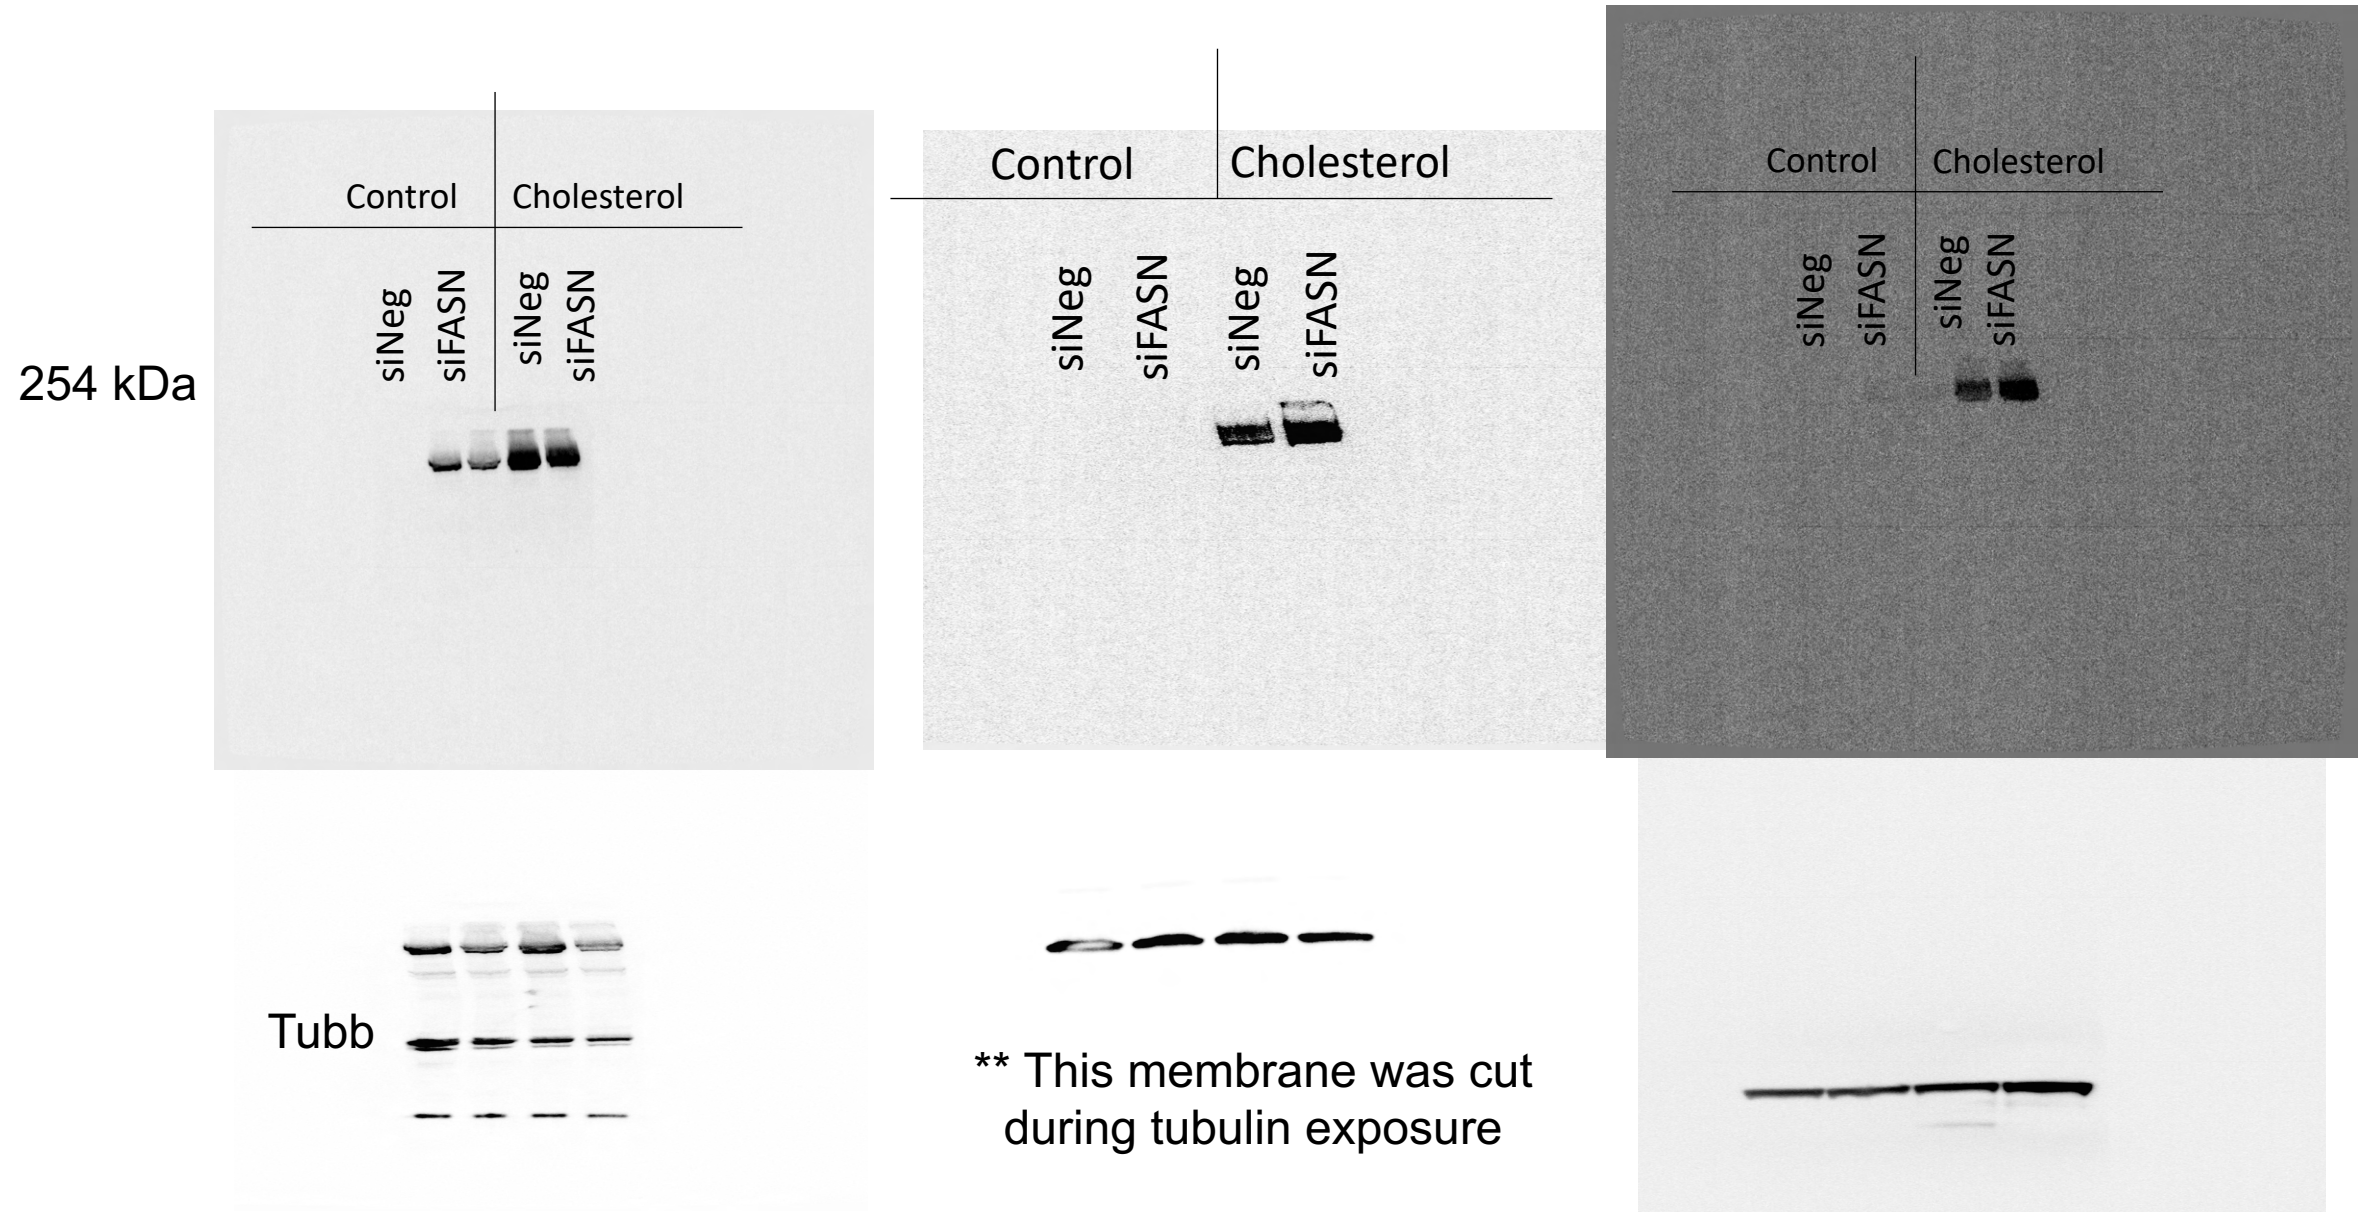



**SOAT1**

Figure 7: (siFASN +/- Cholesterol)

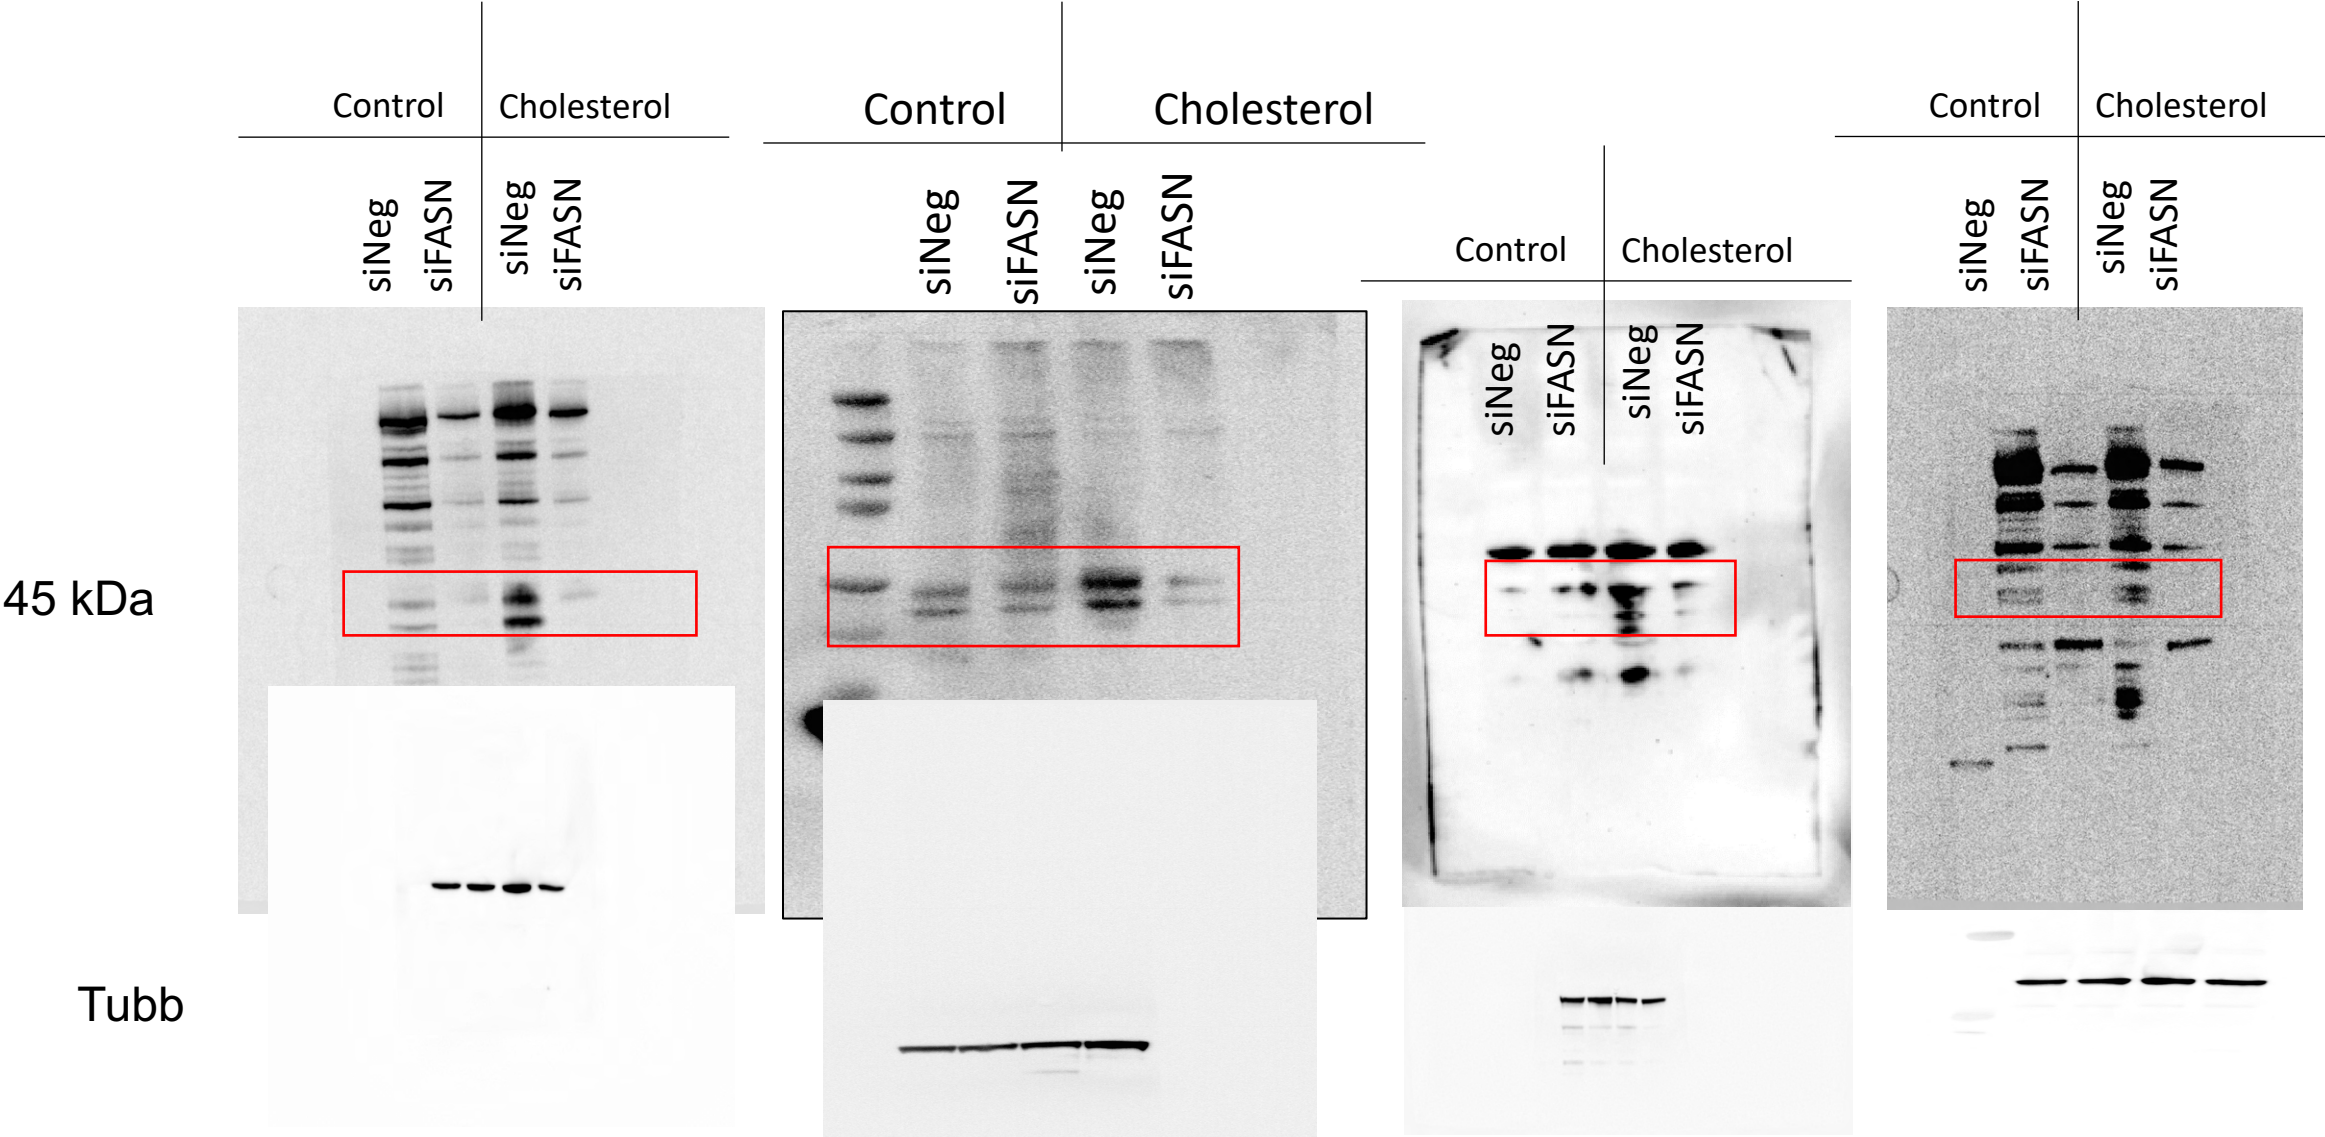

**ABCA1**

Figure 8:siKLF4 +/- Cholesterol

45 kDa

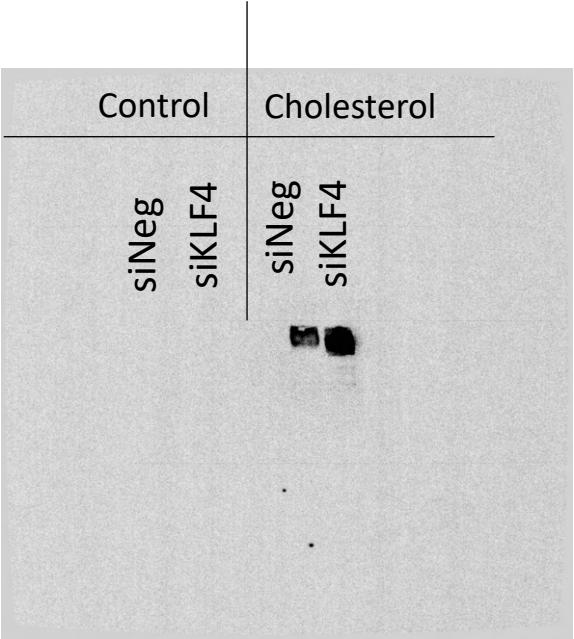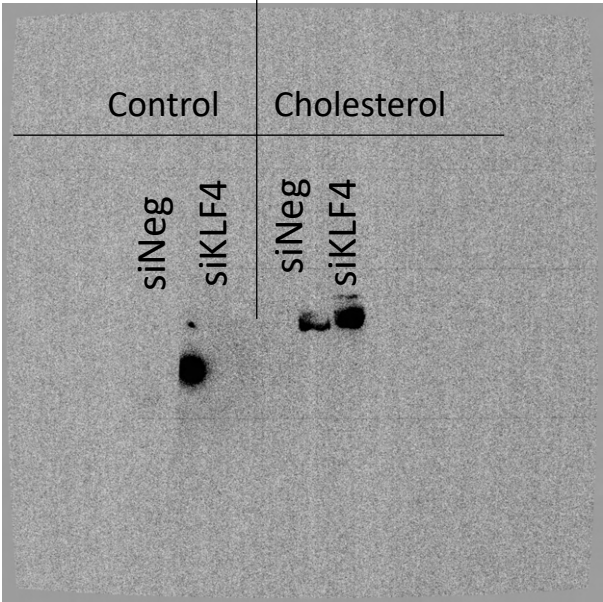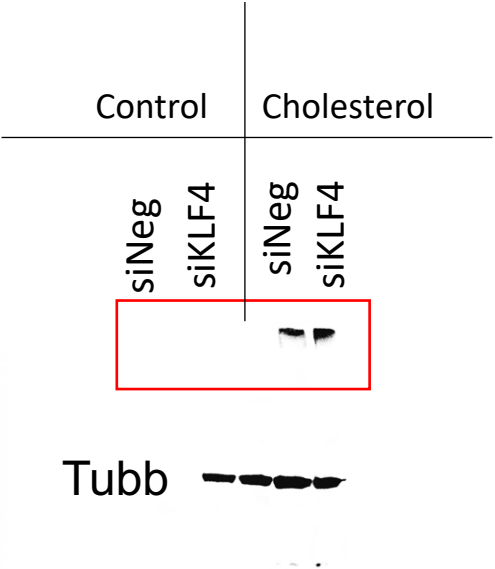

Tubb

Tubb

Tubb

**SOAT1**

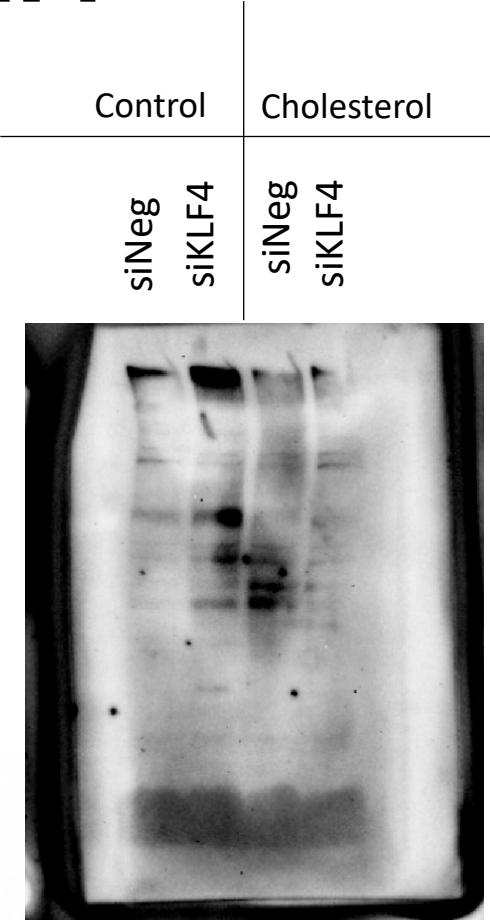

45 kDa

Tubb

Figure 8: siKLF4 +/- Cholesterol

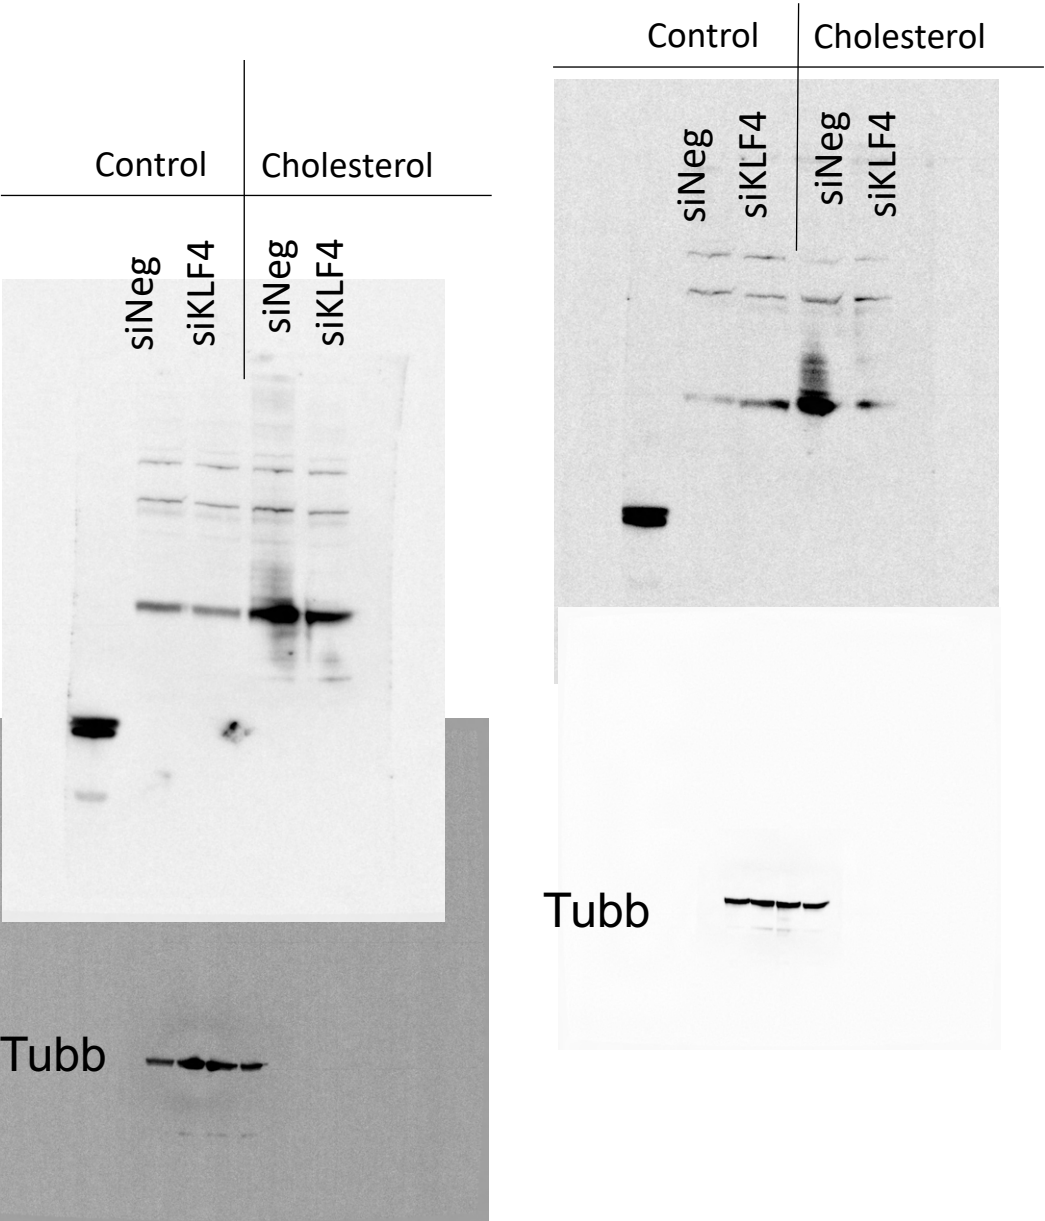

Control

Cholesterol

siNeg  
siKLF4

siNeg  
siKLF4

siNeg  
siKLF4

siNeg  
siKLF4

Control

Cholesterol

siNeg  
siKLF4

siNeg  
siKLF4

siNeg  
siKLF4

siNeg  
siKLF4

Tubb

Tubb
